# Supplementary material
Source: PubMed Central journal article supplement (PMC10330484)
Supplement: NIHMS1902645-supplement-Supinfo.pdf [file NIHMS1902645-supplement-Supinfo.pdf]

# Chemistry–A European Journal

Supporting Information

## **Organoiridium Complexes Enhance Cellular Defense Against Reactive Aldehydes Species**

Rahul D. Jana, Anh H. Ngo, Sohini Bose, and Loi H. Do\*

| <b><u>Table of Contents</u></b> |                                                                                                          | <u>Page(s)</u> |
|---------------------------------|----------------------------------------------------------------------------------------------------------|----------------|
| <b>Experimental Section</b>     |                                                                                                          |                |
| Scheme S1                       | Synthesis of L2 and <b>Ir2</b>                                                                           | S3             |
| Scheme S2                       | Synthesis of 4-HNE and 4-ONE                                                                             | S4             |
|                                 | Synthesis and Characterization                                                                           | S5-S7          |
| <b>Experimental Data</b>        |                                                                                                          |                |
| Figure S1                       | GC chromatogram of Transfer Hydrogenation Reactions                                                      | S7             |
| Table S1                        | Transfer Hydrogenation of 4-HNE under Biologically Relevant Conditions                                   | S8             |
| Table S2                        | Transfer Hydrogenation with Low Concentrations of 4-HNE                                                  | S9             |
| Figure S2                       | Transfer Hydrogenation of 4-ONE                                                                          | S9             |
| Figure S3                       | <sup>1</sup> H NMR Spectrum of 4-ONE Reduced Product                                                     | S10            |
| Figure S4                       | Time-dependent <sup>1</sup> H NMR Spectra of 4-HNE + <b>Ir2</b> /HCOONa                                  | S11            |
| Figure S5                       | GC-mass Spectra of Isotope-labeled <b>II</b> in Different Reaction Conditions                            | S12            |
| Figure S6                       | <sup>1</sup> H NMR Spectra of <b>II</b> , Formed from Reaction of 4-HNE with HCOONa/DCOONa by <b>Ir2</b> | S13            |
| Scheme S3                       | Possible Mechanism of Transfer Hydrogenation of Catalyzed by <b>Ir</b> Complex                           | S14            |
| Figure S7                       | Log <i>P</i> , IC <sub>50</sub> and [Ir] of Ir Complexes in NIH-3T3                                      | S14            |
| Table S3                        | Accumulation of Iridium in NIH-3T3 cells (10 μM)                                                         | S15            |
| Table S4                        | Accumulation of Iridium in NIH-3T3 cells (20 μM)                                                         | S16            |
| Figure S8                       | Comparison of ICP-MS Results for Ir Complexes in NIH-3T3 cells                                           | S17            |
| Table S5                        | ICP-MS Results for Ir Complexes in SH-SY5Y cells                                                         | S18            |
| Figure S9                       | Plot of Cell Viability (%) vs Iridium Concentration in NIH-3T3 cells                                     | S19            |
| Figure S10                      | Effect of reduced alcohol products on the cytotoxicity of Ir <sub>2</sub> in NIH-3T3 cells               | S20            |
| Figure S11                      | IC <sub>50</sub> of Iridium Complexes in NIH-3T3 cells                                                   | S21            |
| Figure S12                      | Effect of HCOONa on the Cytotoxicity of Ir Complexes in NIH-3T3 cells                                    | S22            |
| Figure S13                      | IC <sub>50</sub> of Aldehydes, Alcohols, and Aldehyde Scavengers in NIH-3T3 cells                        | S23            |
| Figure S14                      | 4-HNE Detoxification by Iridium Complexes in SH-SY5Y cells                                               | S24            |
| Figure S15                      | Detoxification of 4-HNE by Ir Complexes in NIH-3T3 cells                                                 | S25            |
| Figure S16                      | Comparing 4-HNE Detoxification Ability of Iridium Complexes and Aldehyde Scavengers in NIH-3T3 cells     | S26            |
| Figure S17                      | Effects of GSH on 4-HNE detoxification by <b>Ir2</b> in NIH-3T3 cells                                    | S27            |
| Figure S18                      | Detoxification of 4-ONE by Ir Complexes in SH-SY5Y cells                                                 | S28            |

|                                  |                                                                                                                               |         |
|----------------------------------|-------------------------------------------------------------------------------------------------------------------------------|---------|
| Figure S19                       | Comparing 4-ONE Detoxification Ability of Iridium Complexes and Aldehyde Scavengers in SH-SY5Y cells                          | S29     |
| Figure S20                       | 4-ONE Detoxification by Iridium Complexes in NIH-3T3 cells                                                                    | S30     |
| Figure S21                       | 4-HNE Detoxification by Ir Complexes in SH-SY5Y Cells with the Addition of 4-HNE for Three Consecutive Days                   | S31     |
| Figure S22                       | Effect of Ir Concentration in 4-HNE Detoxification Inside SH-SY5Y Cells with the Addition of 4-HNE for Three Consecutive Days | S32     |
| Figure S23                       | 4-HNE Detoxification by Aldehyde Scavengers in SH-SY5Y Cells with the Addition of 4-HNE for Three Consecutive Days            | S33     |
| <b>NMR Characterization Data</b> |                                                                                                                               |         |
| Figures S24-S29                  | $^1\text{H}$ and $^{13}\text{C}$ NMR of Ligand <b>L2</b> and <b>Ir2</b> Complex                                               | S34-S39 |
| Figures S30-S38                  | $^1\text{H}$ and $^{13}\text{C}$ NMR of 4-HNE and 4-ONE, their Reduced Alcohol Products                                       | S40-S48 |
| <b>References</b>                |                                                                                                                               | S49     |

## EXPERIMENTAL SECTION

### Synthesis and Characterization

#### A. Synthesis of Ligand **L2**

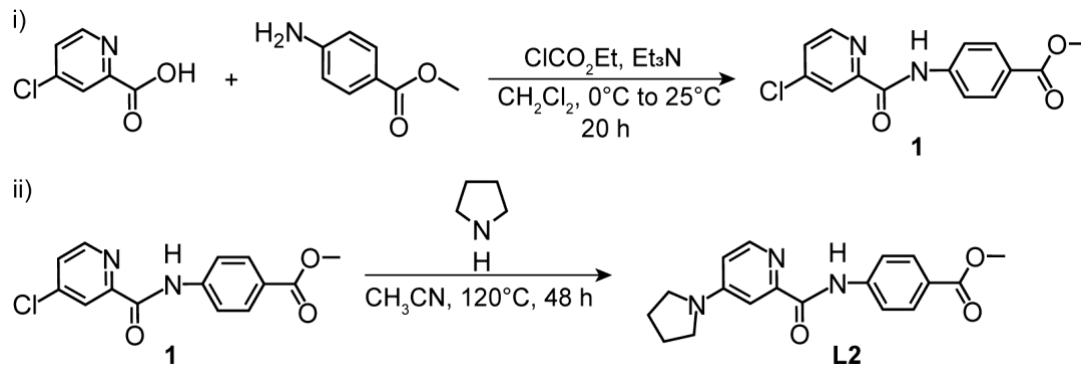

#### B. Synthesis of Complex **Ir2**

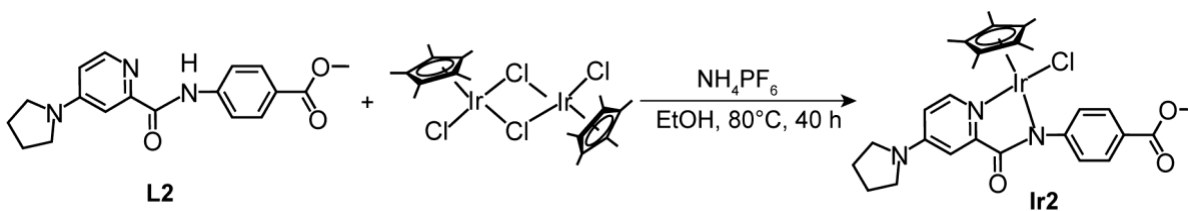

**Scheme S1.** Synthetic scheme for the preparation of ligand (**L2**, A) and its corresponding iridium complex (**Ir2**, B).

A. Synthesis of 4-hydroxynon-2-enal (4-HNE) and 4-oxonon-2-enal (4-ONE)

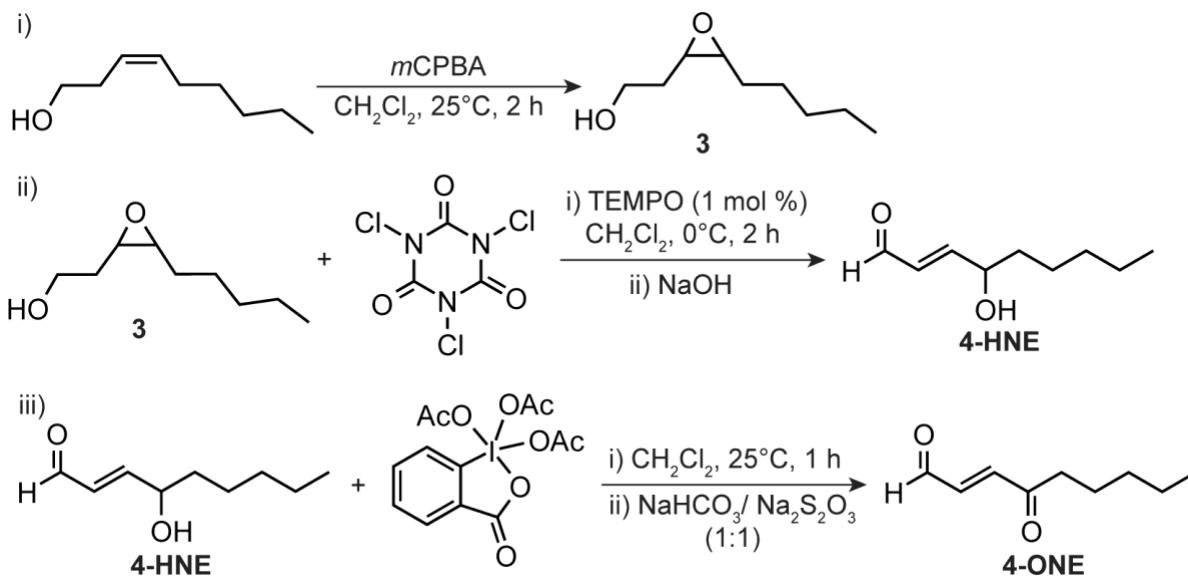

B. Synthesis of reduced alcohol products derived from 4-HNE and 4-ONE

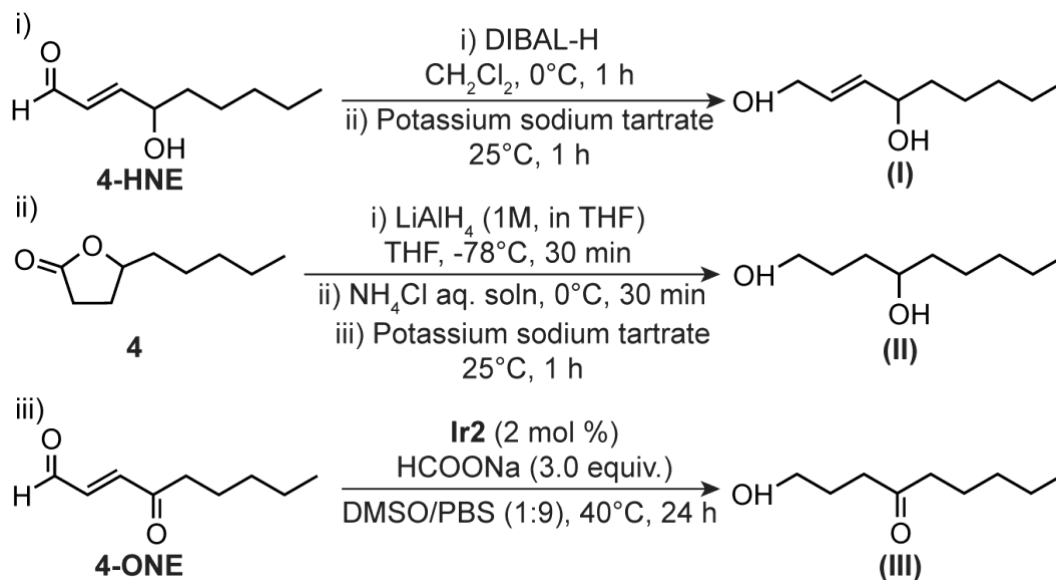

**Scheme S2.** Synthetic scheme for the preparation of aldehydes 4-HNE and 4-ONE (A) and their reduced alcohol products (B).

**Preparation of Compound 1.** In a 200 mL round bottom flask, 4-chloro-2-pyridinecarboxylic acid (1.58 g, 10.0 mmol, 1.0 equiv.) was dissolved in ~100 mL of anhydrous dichloromethane, and cooled in an ice bath

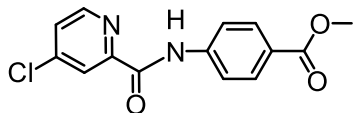

for ~15 min. Triethylamine (2.79 mL, 20.0 mmol, 2.0 equiv.) was added and stirred for 15 min. The mixture was then treated with ethyl chloroformate (1.24 mL, 13.0 mmol, 1.3 equiv.) and stirred in an ice bath for another 30 min before combining with methyl 4-aminobenzoate (0.91 g, 6.0 mmol, 0.6

equiv.). The reaction was stirred in an ice bath for 1 h, warmed to RT, and stirred for another 20 h. Once the reaction was complete, water was added and the organic phase was separated, dried over sodium sulfate, and evaporated to dryness. The crude product was purified by washing with diethyl ether, followed by recrystallization in dichloromethane to obtain a white solid (462 mg, 27% yield).  $^1\text{H}$  NMR ( $\text{CDCl}_3$ , 600 MHz):  $\delta$  10.10 (s, 1H), 8.53 (d,  $J = 5.1$  Hz, 1H), 8.30 (d,  $J = 2.0$  Hz, 1H), 8.08 (d,  $J = 8.3$  Hz, 2H), 7.85 (d,  $J = 8.3$  Hz, 2H), 7.51 (dd,  $J = 4.9, 2.0$  Hz, 1H), 3.92 (s, 3H).  $^{13}\text{C}\{^1\text{H}\}$  NMR ( $\text{CDCl}_3$ , 126 MHz):  $\delta$  166.68, 161.10, 150.89, 149.04, 146.54, 141.58, 131.05, 127.07, 126.04, 123.29, 119.06, 52.18. GC-MS: calculated for  $\text{C}_{14}\text{H}_{11}\text{ClN}_2\text{O}_3$   $m/z = 290.0$   $[\text{M}]^+$ , found  $m/z = 290.4$ .

**Preparation of Ligand L2.** In a high-pressure glass tube, compound 1 (290.7 mg, 1.0 mmol, 1 equiv.) and pyrrolidine (1.7 mL, 20 mmol, 20 equiv.) were combined with 5.0 mL of acetonitrile in a high-pressure glass

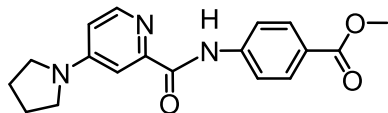

tube. The tube was sealed tightly using a Teflon screw cap and the mixture was stirred at 120 °C for 48 h. After removing the solvent and unreacted pyrrolidine by high vacuum, the resulting off-white solid was washed with methanol (3x10 mL) to obtain a white solid (263 mg, 81%

yield).  $^1\text{H}$  NMR ( $\text{CDCl}_3$ , 600 MHz):  $\delta$  10.37 (s, 1H), 8.16 (d,  $J = 5.7$  Hz, 1H), 8.06 (d,  $J = 8.4$  Hz, 2H), 7.85 (d,  $J = 8.5$  Hz, 2H), 7.40 (s, 1H), 6.48 (dd,  $J = 6.1, 2.1$  Hz, 1H), 3.90 (s, 3H), 3.39 (s, 4H), 2.06 (m, 4H).  $^{13}\text{C}\{^1\text{H}\}$  NMR ( $\text{CDCl}_3$ , 126 MHz): 166.86, 163.53, 152.92, 149.41, 148.00, 142.31, 130.98, 125.34, 118.87, 109.02, 105.81, 52.11, 47.40, 25.46 ppm. GC-MS: calculated for  $\text{C}_{18}\text{H}_{19}\text{N}_3\text{O}_3$   $m/z = 325.1$   $[\text{M}]^+$ , found  $m/z = 325.5$ .

**Preparation of 4-hydroxynon-2-enal (4-HNE).** This synthetic method was modified from the procedure

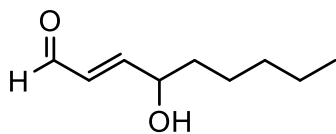

described by Gardner et. al.<sup>1</sup> To a solution of compound 3 (344 mg, 2.18 mmol) in 30 mL of anhydrous  $\text{CH}_2\text{Cl}_2$  at 0 °C, trichloroisocyanuric acid (TCICA) (535 mg, 2.29 mmol) was added slowly. The reaction mixture was stirred for 5 min at 0 °C. TEMPO was then added to the reaction mixture and

stirred for another 2 h at 0 °C. After the reaction was complete, 30 mL of water was added, and the mixture was stirred vigorously for 10 min to obtain a clear light-yellow solution. The organic layer was then washed with 1.0 M NaOH (3x20 mL). The organic extract was dried over sodium sulfate and evaporated to dryness to yield a light yellow oil (259 mg, 76%). This compound was stored at -20 °C to minimize decomposition.  $^1\text{H}$  NMR ( $\text{CDCl}_3$ , 400 MHz):  $\delta$  9.58 (d,  $J = 7.7$  Hz, 1H), 6.82 (dd,  $J = 15.8, 4.6$  Hz, 1H), 6.38-6.24 (m, 1H), 4.44 (q,  $J = 6.5, 5.8$  Hz, 1H), 1.67-1.59 (m, 2H), 1.36-1.28 (m, 6H), 0.93-0.86 (m, 3H) ppm.  $^{13}\text{C}$  NMR ( $\text{CDCl}_3$ , 101 MHz):  $\delta$  194.23, 160.57, 130.12, 70.67, 36.11, 31.46, 24.78, 22.35, 13.85 ppm. The NMR spectra matched those reported previously.<sup>1</sup>

**Preparation of 4-oxonon-2-enal (4-ONE).**

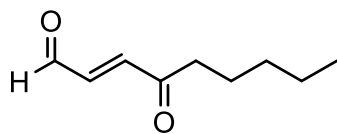

This compound was synthesized according to a literature procedure with modification.<sup>2</sup> Solid Dess-Martin periodinane (156 mg, 1.0 mmol) was added slowly to a solution of 4-HNE in anhydrous CH<sub>2</sub>Cl<sub>2</sub> (20 mL) and stirred at 25 °C for 1 h. The reaction mixture was then washed with an aqueous solution containing NaHCO<sub>3</sub> and Na<sub>2</sub>S<sub>2</sub>O<sub>3</sub> (1:1, 3x15 mL). The

organic phase was dried over sodium sulfate and evaporated to dryness to obtain a yellow oil (52 mg, 33% yield). The <sup>1</sup>H NMR data are consistent with that reported in the literature.<sup>2</sup> <sup>1</sup>H NMR (CDCl<sub>3</sub>, 400 MHz): δ 9.78 (d, *J* = 7.0 Hz, 1H), 6.88 (d, *J* = 16.2 Hz, 1H), 6.83-6.73 (m, 1H), 2.69 (t, *J* = 7.3 Hz, 2H), 1.70-1.63 (m, 2H), 1.36-1.27 (m, 4H), 0.90 (t, *J* = 6.9 Hz, 3H) ppm. <sup>13</sup>C NMR (CDCl<sub>3</sub>, 151 MHz): δ 200.31, 193.58, 145.09, 137.46, 41.32, 31.37, 23.48, 22.54, 14.00 ppm. The NMR spectra matched those reported previously.<sup>2</sup>

**Preparation of non-2-ene-1,4-diol (I).**

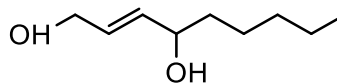

In a 50 mL round bottom flask, 4-HNE (136 mg, 0.87 mmol, 1.0 equiv.) was dissolved in 15 mL of anhydrous CH<sub>2</sub>Cl<sub>2</sub> and cooled to 0 °C for 1 h. Diisobutylaluminium hydride (DIBAL-H, 1M in THF) (2.2 mL, 2.18 mmol, 2.5 equiv.) was added dropwise to the reaction mixture under an inert

atmosphere and stirred for 1 h at 0 °C. The reaction mixture was quenched with an aqueous solution of potassium sodium tartrate and stirred for another 3 h at RT. The aqueous layer was then extracted with CH<sub>2</sub>Cl<sub>2</sub> (3x15 mL) and the combined organic fractions were dried over Na<sub>2</sub>SO<sub>4</sub> and evaporated to a colorless oil (56 mg, 41 %). <sup>1</sup>H NMR (CDCl<sub>3</sub>, 400 MHz): δ 5.79-5.73 (m, 1H), 5.70-5.63 (m, 1H), 4.11-4.04 (m, 3H), 3.34-3.08 (m, 2H), 1.53-1.41 (m, 2H), 1.35-1.22 (m, 6H), 0.86 (t, *J* = 6.3 Hz, 3H) ppm. <sup>13</sup>C NMR (CDCl<sub>3</sub>, 151 MHz): δ 134.63, 129.77, 72.38, 62.77, 37.19, 31.87, 25.22, 22.71, 14.14 ppm. The NMR spectra are consistent with those reported previously.<sup>3</sup>

**Preparation of nonane-1,4-diol (II).**

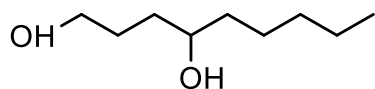

$\gamma$ -Nonalactone (976 mg, 6.26 mmol, 1.0 equiv.) was dissolved in 20 mL of anhydrous THF and then cooled to -78 °C. A solution containing LiAlH<sub>4</sub> (1 M in THF, 13.2 mL, 13.14 mmol, 2.1 equiv.) was added dropwise to the reaction mixture under an inert atmosphere and stirred for 30 min

at -78 °C. The reaction flask was then warmed to 0 °C and an aqueous solution of saturated NH<sub>4</sub>Cl was added dropwise, leading to the formation of H<sub>2</sub> gas and a thick white mixture. The reaction mixture was stirred for another 30 min at 0 °C, warmed to RT, and combined with a solution of potassium sodium tartrate (25 mL), and stirred for another 1 h at RT. The organic layer was separated, and the aqueous layer was extracted with ethyl acetate (2x20 mL). The combined organic fractions were dried over Na<sub>2</sub>SO<sub>4</sub> and evaporated to afford a colorless oil (765 mg, 76%). <sup>1</sup>H NMR (CDCl<sub>3</sub>, 500 MHz): δ 3.78-3.56 (m, 3H), 2.48 (s, 2H), 1.78-1.58 (m, 2H), 1.48-1.45 (m, 4H), 1.35-1.24 (m, 6H), 0.88 (t, *J* = 6.7 Hz, 3H) ppm. <sup>13</sup>C NMR (CDCl<sub>3</sub>, 101 MHz): δ 72.05, 63.15, 37.70, 34.53, 32.00, 29.27, 25.56, 22.78, 14.19 ppm. The NMR spectra are consistent with those reported previously.<sup>4</sup>

**Preparation of 1-hydroxynonan-4-one (III).** In a 20 mL vial, a mixture of 4-ONE (45 mg, 0.29 mmol, 1.0 equiv.), HCOONa (62 mg, 0.90 mmol, 3.0 equiv.), and iridium catalyst **Ir2** (4.1 mg, 0.006 mmol, 2 mol%) in DMSO:PBS (10:90) was heated at 40 °C for 24 h. Once the reaction was complete, the reaction mixture was extracted into diethyl ether (2x10 mL), concentrated, and then purified in silica gel column chromatography (15% EtOAc in hexane). Yield: 14 mg (30%). <sup>1</sup>H NMR (CDCl<sub>3</sub>, 500 MHz): δ 3.68-3.64 (m, 2H), 2.58-2.54 (m, 2H), 2.45-2.38 (m, 2H), 1.87-1.80 (m, 2H), 1.33-1.26 (m, 6H), 0.89 (t, *J* = 7.0, 3H) ppm. The <sup>1</sup>H NMR spectrum is consistent with that reported previously.<sup>5</sup>

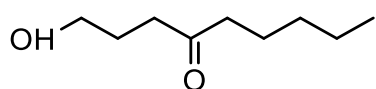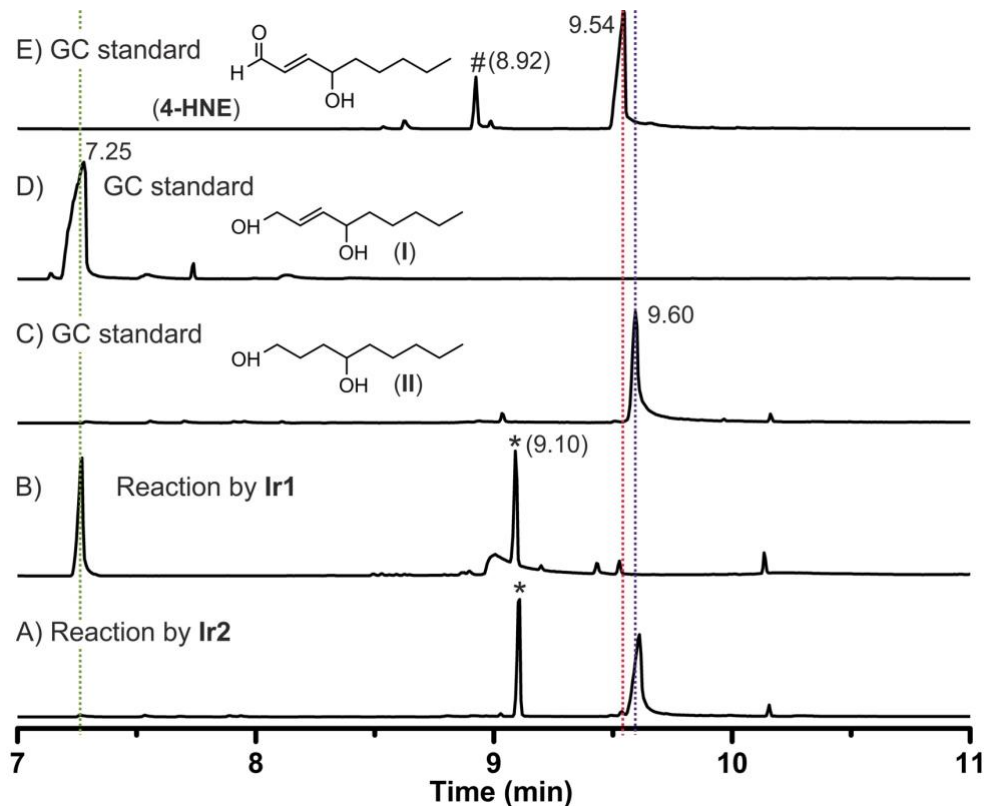

**Figure S1.** Gas chromatograms obtained from the reaction of 4-HNE (50 μmol) with HCOONa (150 μmol) and either A) **Ir1** or B) **Ir2** (0.50 μmol) in a mixture of DMSO/ PBS (5:95; 3 mL) at 37 °C for 15 h. GC traces of authentic samples of **II** (C), **I** (D), and **4-HNE** (E) for comparison. The peaks marked with an asterisk (\*) indicate the presence of the internal standard pentamethylbenzene. The peak marked with a hastag (#) is assigned as a decomposition product of 4-HNE.



**Table S1.** Reduction of 4-HNE Using Ir2 and HCOONa Under Biologically Relevant Conditions<sup>a</sup>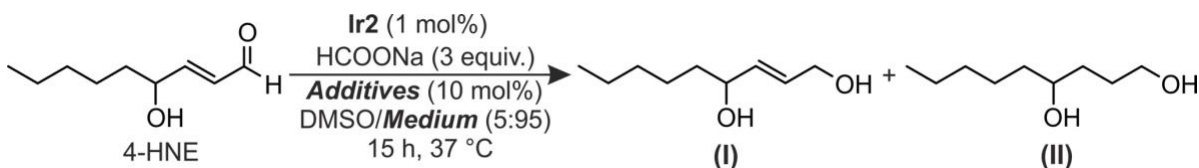

| Entry          | Media                                      | Additives (equiv., relative to Ir) | Conversion (%) | Yield of I (%) <sup>b</sup> | Yield of II (%) <sup>b</sup> |
|----------------|--------------------------------------------|------------------------------------|----------------|-----------------------------|------------------------------|
| 1              | PBS                                        | -                                  | 97 ± 2         | <1                          | 94 ± 2                       |
| 2 <sup>c</sup> | PBS                                        | -                                  | 94             | 85                          | 7                            |
| 3 <sup>d</sup> | PBS                                        | -                                  | 86 ± 2         | 30 ± 2                      | 58 ± 2                       |
| 4              | RMPI-1640                                  | -                                  | 97 ± 3         | 3 ± 1                       | 88 ± 3                       |
| 5              | DMEM                                       | -                                  | 98 ± 2         | 2 ± 1                       | 93 ± 4                       |
| 6              | DMEM+ 10% FBS + 1% Penicillin Streptomycin | -                                  | 77 ± 2         | 58 ± 6                      | 7 ± 3                        |
| 7              | DMEM                                       | L-Glutathione reduced (10)         | 40 ± 2         | 26 ± 2                      | 11 ± 2                       |
| 8              | DMEM                                       | L-Glutathione reduced (20)         | 10 ± 2         | 3 ± 2                       | 0                            |
| 9              | DMEM                                       | L-Cysteine (10)                    | 7 ± 2          | 3 ± 2                       | 0                            |
| 10             | DMEM                                       | L-Histidine (10)                   | 95 ± 2         | 14 ± 1                      | 83 ± 2                       |
| 11             | DMEM                                       | L-Lysine (10)                      | 96 ± 1         | 3 ± 2                       | 86 ± 2                       |

<sup>a</sup>Reaction conditions: 4-HNE (50 μmol), HCOONa (150 μmol), Ir complex (0.50 μmol), DMSO/Medium (5:95, 3 mL), 37 °C, 15 h. <sup>b</sup>The reaction yields were quantified using gas chromatography with pentamethylbenzene as an internal standard. The yields shown are the average values obtained from triplicate runs. <sup>c</sup>This reaction was carried out using Ir1 (1 mol %) instead of Ir2. <sup>d</sup>The reaction was performed using NADH (150 μmol) instead of HCOONa as a hydride source.

**Table S2.** Reduction of 4-HNE Using Ir2 and HCOONa in DMEM<sup>a</sup>

| Entry | Concentration of 4-HNE (mM) | Ir2 loading (mol%) | Conversion (%) | Yield of I (%) <sup>b</sup> | Yield of II (%) <sup>b</sup> |
|-------|-----------------------------|--------------------|----------------|-----------------------------|------------------------------|
| 1     | 17                          | 170 $\mu$ M (1)    | 97 $\pm$ 2     | < 1                         | 94 $\pm$ 3                   |
| 2     | 1.0                         | 10 $\mu$ M (1)     | 26 $\pm$ 3     | 21 $\pm$ 2                  | 0                            |
| 3     | 0.5                         | 10 $\mu$ M (2)     | 31 $\pm$ 3     | 26 $\pm$ 2                  | 0                            |
| 4     | 0.25                        | 10 $\mu$ M (4)     | 38 $\pm$ 3     | 33 $\pm$ 4                  | 3 $\pm$ 2                    |
| 5     | 0.25                        | 50 $\mu$ M (20)    | 95 $\pm$ 2     | 2.5 $\pm$ 1                 | 88 $\pm$ 3                   |

<sup>a</sup>Reaction conditions: HCOONa (5 mM), DMSO/DMEM (5:95, 3 mL), 37 °C, 15 h. <sup>b</sup>The reaction yields were determined by gas chromatography using pentamethylbenzene as an internal standard. Yields are the average of triplicate runs.

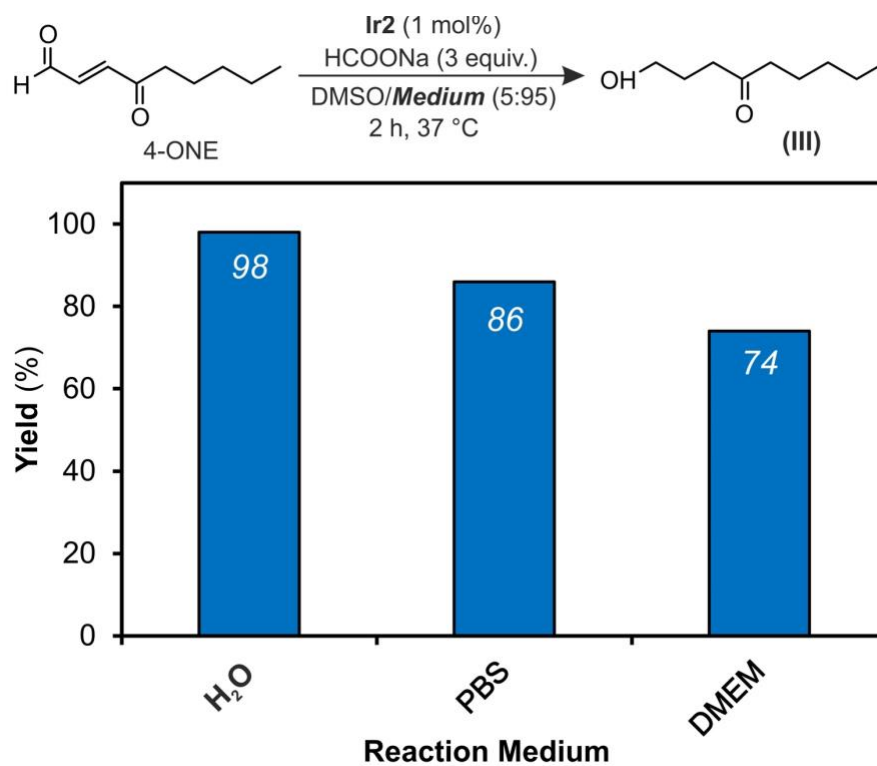

**Figure S2.** Transfer hydrogenation between 4-ONE and HCOONa catalyzed by Ir2 in biologically relevant media. Reaction conditions: 4-ONE (50  $\mu$ mol), HCOONa (150  $\mu$ mol), Ir2 (0.50  $\mu$ mol), DMSO/Medium (5:95, 3 mL), 37 °C, 2 h. The reaction yields were quantified by <sup>1</sup>H NMR spectroscopy using 1,3,5-trimethoxybenzene as an internal standard.

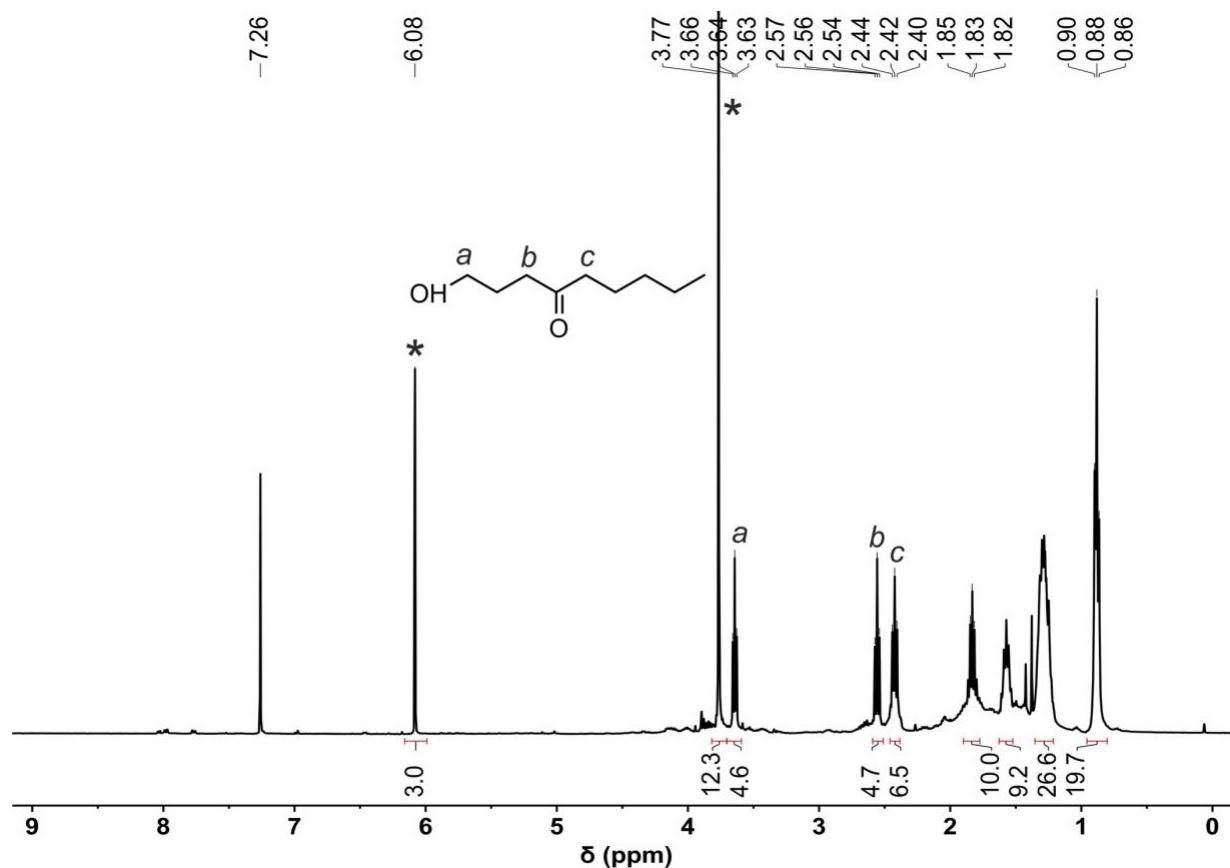

**Figure S3.**  $^1\text{H}$  NMR (400 MHz,  $\text{CDCl}_3$ ) spectrum of product **III** formed in the reaction of 4-ONE (50  $\mu\text{mol}$ ) with **Ir2** (0.50  $\mu\text{mol}$ ) and  $\text{HCOONa}$  (150  $\mu\text{mol}$ ) in DMEM at 37  $^\circ\text{C}$  for 2 h. The NMR peaks at 3.64, 2.56, and 2.42 ppm are consistent with those assigned to **III** in the literature.<sup>5</sup> The peaks marked with an asterisk (\*) correspond to the internal standard 1,3,5-trimethoxybenzene.

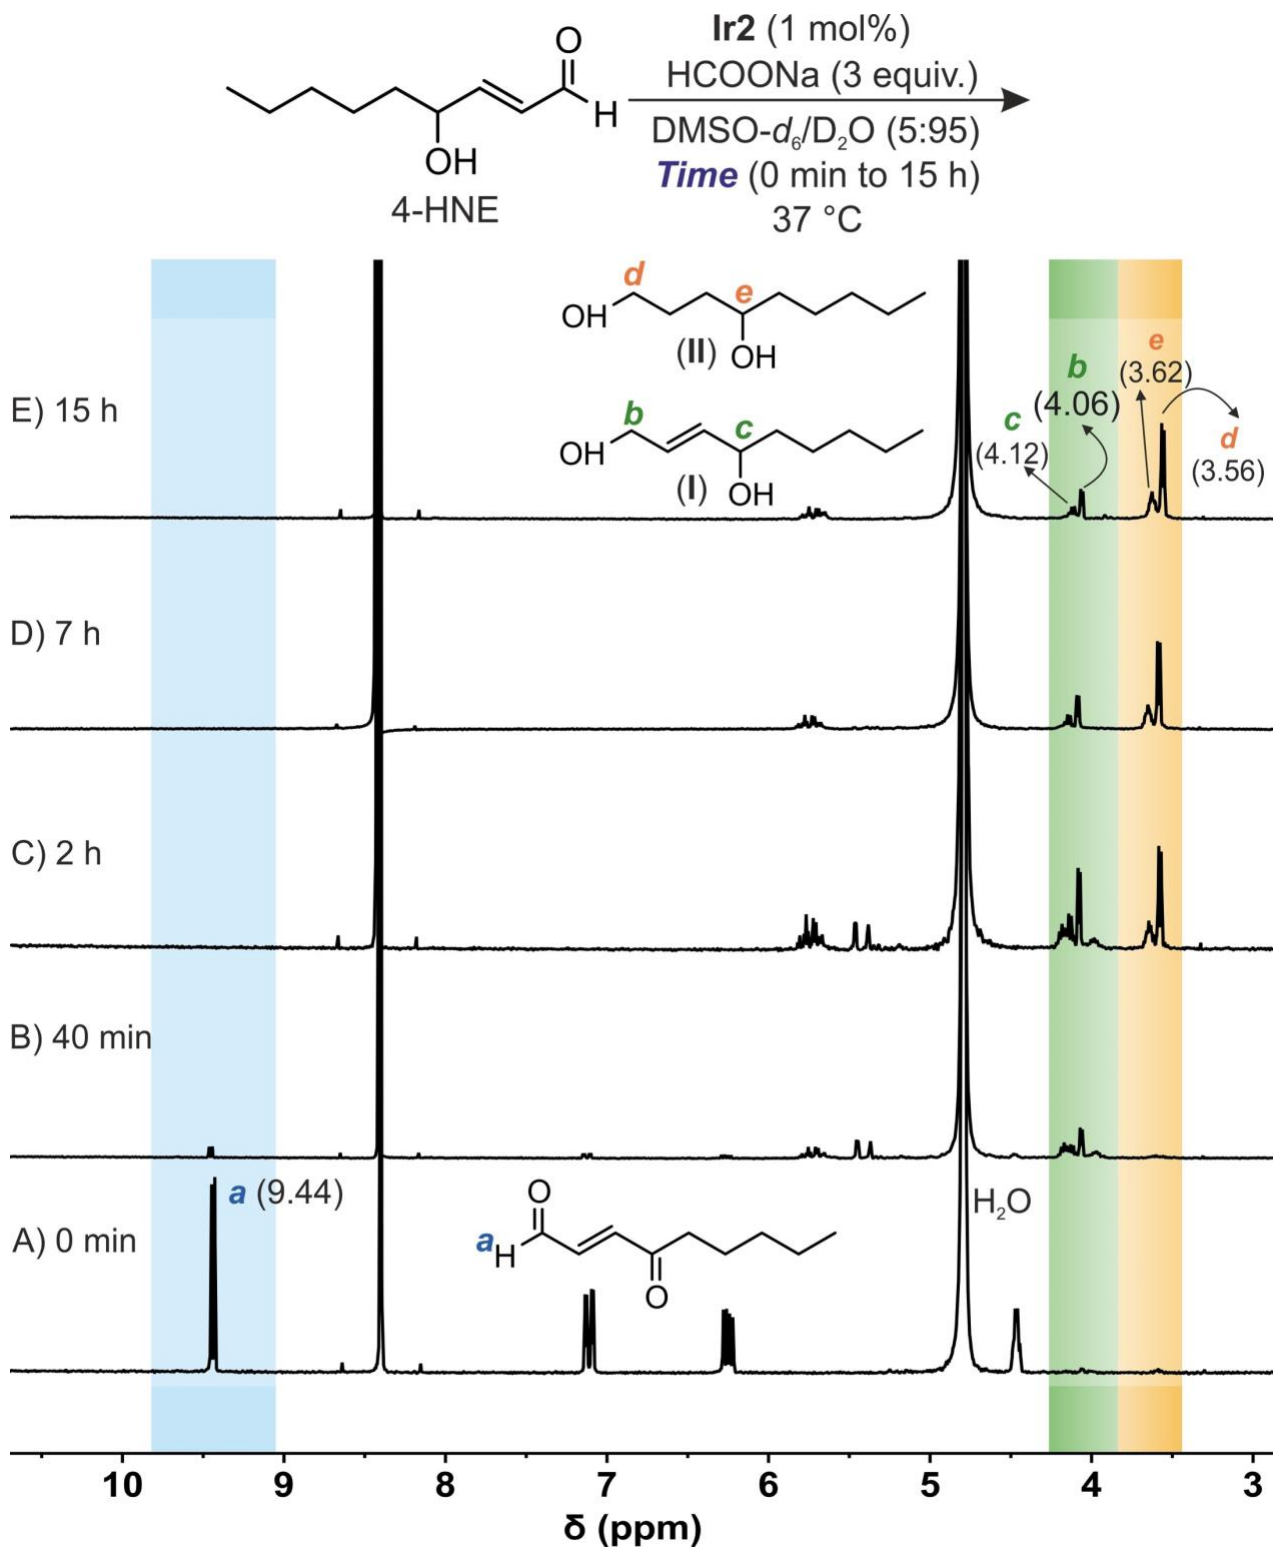

**Figure S4.** Time-dependent  $^1\text{H}$  NMR spectra (400 MHz) obtained from the reaction of 4-HNE (50  $\mu\text{mol}$ ) with HCOONa (150  $\mu\text{mol}$ ) and **Ir2** complex (0.50  $\mu\text{mol}$ ) in a mixture of  $\text{D}_2\text{O}/\text{DMSO-}d_6$  (95:5; 3 mL) at 37 °C. The peak assignments for 4-HNE (blue), **I** (green), and **II** (orange) are shown above in different colors.

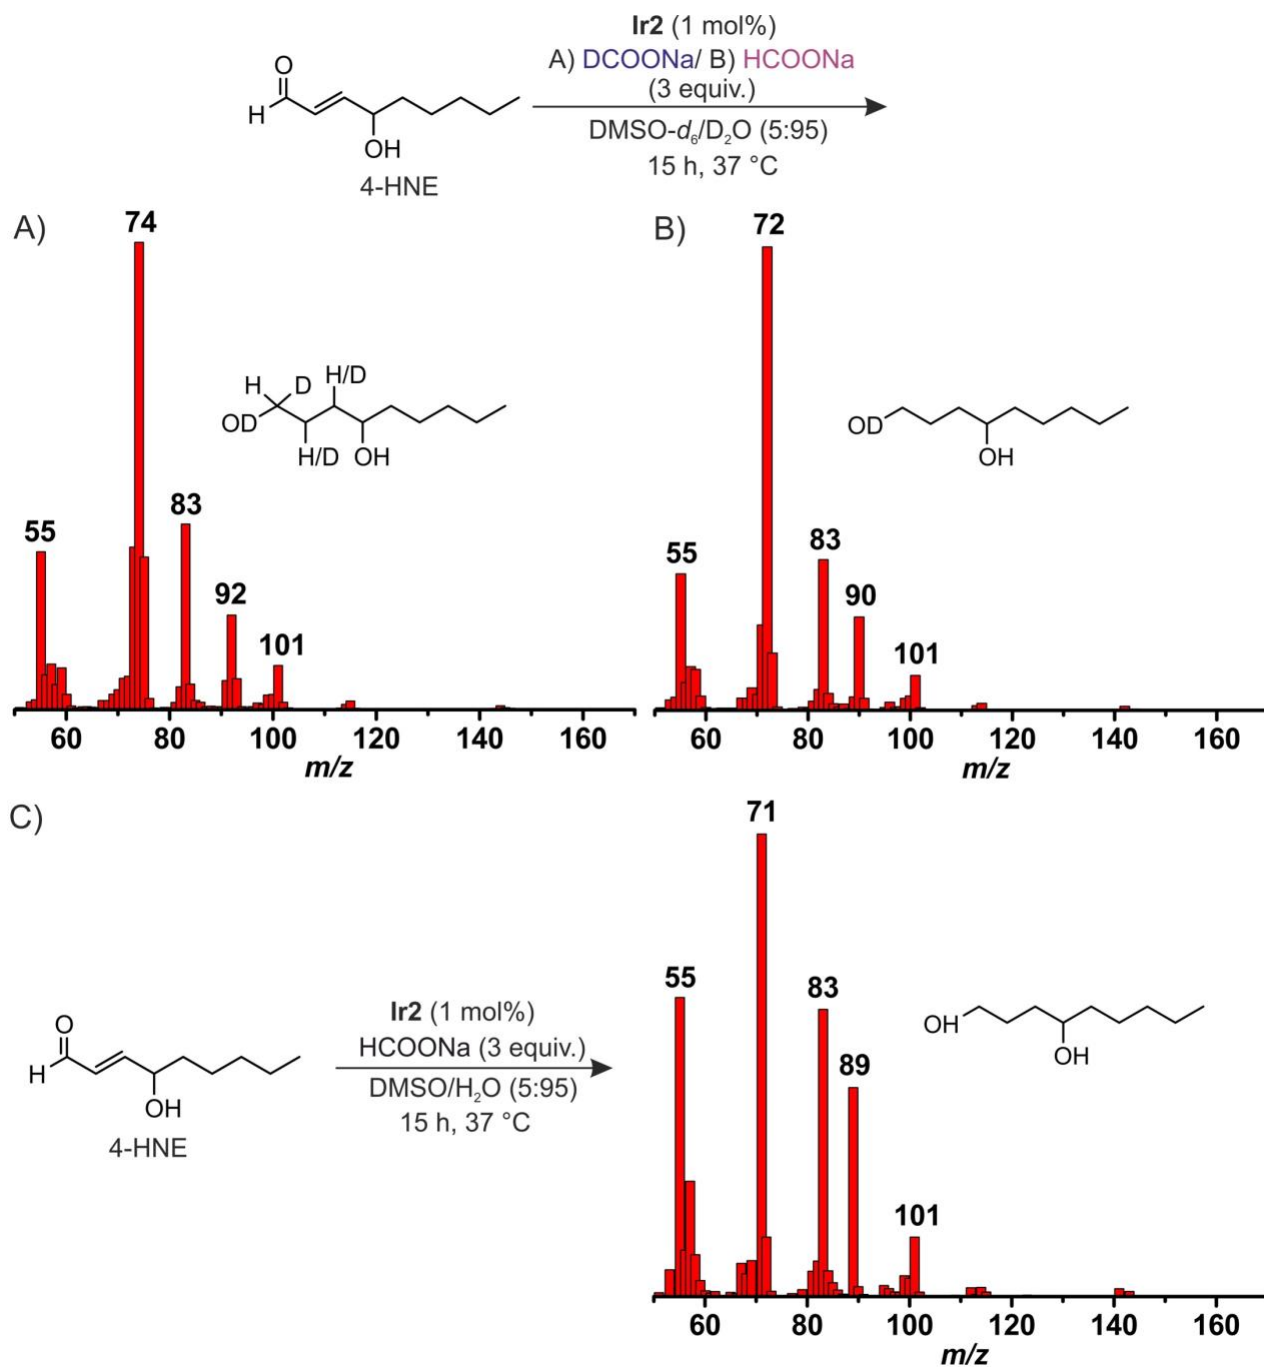

**Figure S5.** GC-mass spectra of nonane-1,4-diol (**I**) formed from the reaction of 4-HNE with A) DCOONa and B) HCOONa by **Ir2** complex in D<sub>2</sub>O/DMSO-*d*<sub>6</sub> (95:5). C) GC-mass spectrum of isolated nonane-1,4-diol (**I**) formed in the reaction of 4-HNE with HCOONa and **Ir2** in H<sub>2</sub>O/DMSO (95:5). The ion fragments of **I** in part C appear at *m/z* 71 for [M-(C<sub>5</sub>H<sub>13</sub>O)], and 89 for [M-(C<sub>5</sub>H<sub>11</sub>)], which are shifted to one or three mass units depending on the reaction conditions. The molecule ions parent [M]<sup>+</sup> were not observed.

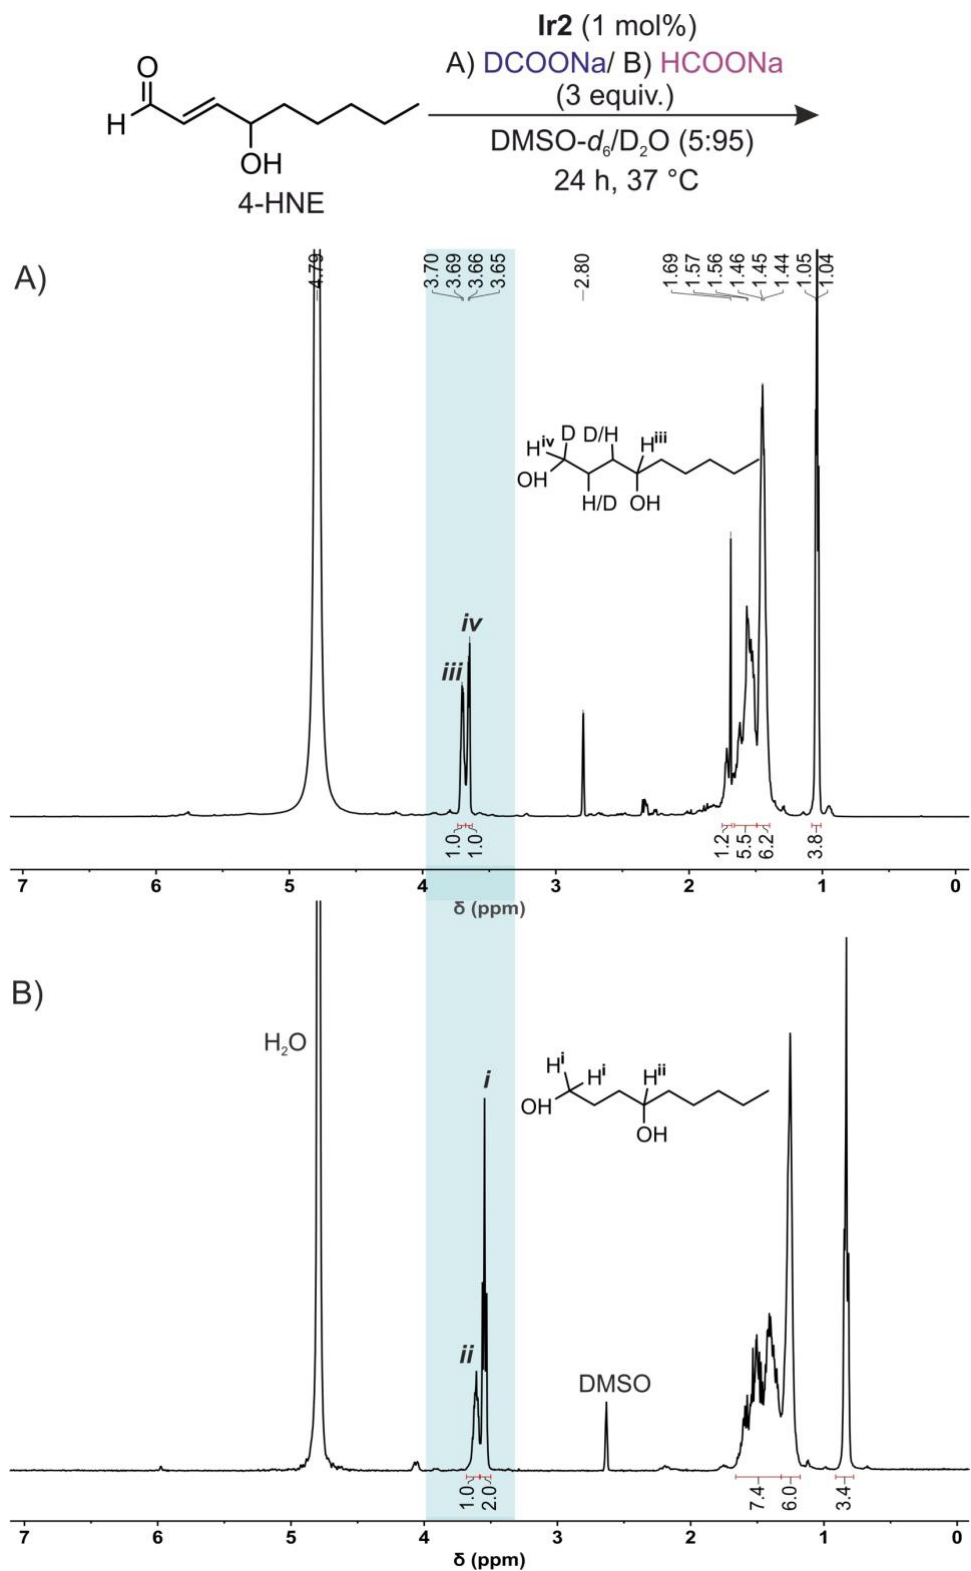

**Figure S6.** <sup>1</sup>H NMR spectra (400 MHz) spectra of compound **I** formed in the reaction of 4-HNE with HCOONa (A) or DCOONa (B) and **Ir2** in D<sub>2</sub>O/DMSO-*d*<sub>6</sub> (95:5). Reaction conditions used: 4-HNE (50 μmol), HCOONa or DCOONa (150 μmol), Ir complex (0.50 μmol), D<sub>2</sub>O/DMSO-*d*<sub>6</sub> (95:5; 3 mL), 37 °C, 15 h.

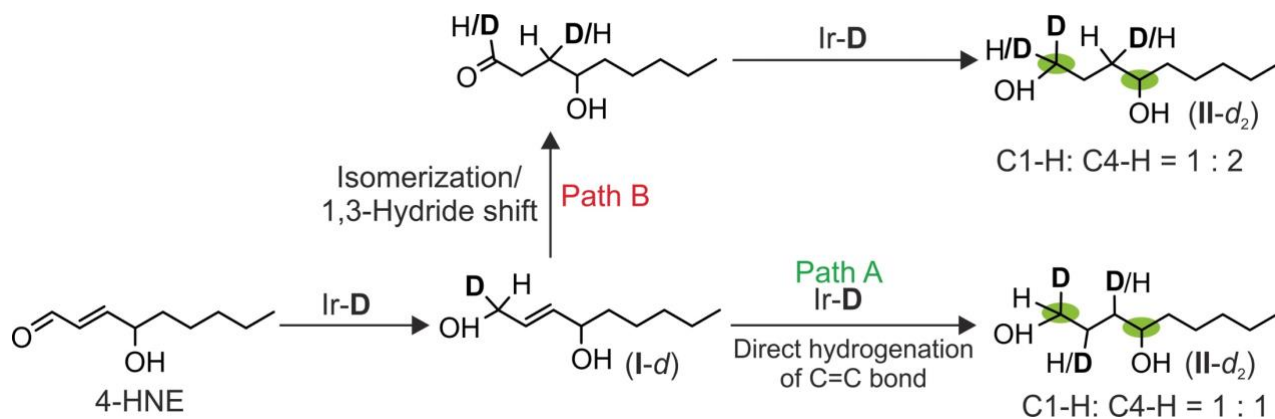

**Scheme S3.** Possible mechanisms for the transfer hydrogenation between 4-HNE and DCOONa catalyzed by Ir2 in H<sub>2</sub>O. The <sup>1</sup>H NMR peak integration ratio between C1 and C4 is 1:1 in path A but is expected to be 1:2 in path B.

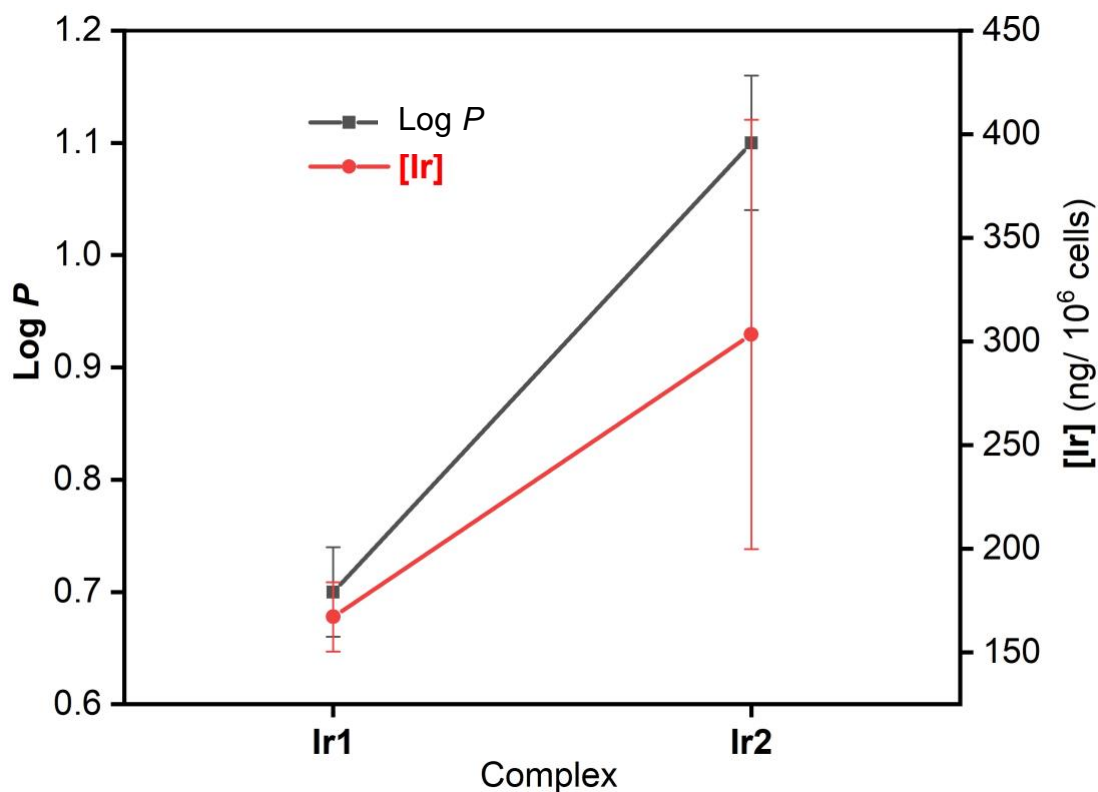

**Figure S7.** Comparison of the Log *P*, IC<sub>50</sub>, and [Ir] of the iridium complexes in NIH-3T3 cells. The Log *P* values were calculated using the formula  $[\text{Ir}]_{\text{octanol}}/[\text{Ir}]_{\text{water}}$ , where  $[\text{Ir}]_{\text{octanol}}$  is the concentration of the Ir complex in octanol and  $[\text{Ir}]_{\text{water}}$  is the concentration of the Ir complex in water determined from the shake flask method. The IC<sub>50</sub> values are the half maximal inhibition concentration of NIH-3T3 cells after incubation with the Ir complexes for 3 h. The iridium accumulation inside NIH-3T3 cells (10 μM of Ir complexes and 3 h incubation) was measured using ICP-MS.

**Table S3.** Accumulation of Iridium Complexes in NIH-3T3 Cells<sup>a</sup>

| Time (h) | Complex | [Ir] (ppb) | Total Ir (ng) | Total Cells (x 10 <sup>6</sup> ) | [Ir] (ng/10 <sup>6</sup> cells) | Average [Ir] (ng/10 <sup>6</sup> cells) | Std. Dev. |
|----------|---------|------------|---------------|----------------------------------|---------------------------------|-----------------------------------------|-----------|
| Control  |         | 0.0        | 0.3           | 0.306                            | 1.1                             | 2.9                                     | 1.7       |
|          |         | 0.2        | 1.5           | 0.286                            | 5.1                             |                                         |           |
|          |         | 0.1        | 0.7           | 0.288                            | 2.4                             |                                         |           |
| 24       | Ir1     | 4.9        | 34.5          | 0.185                            | 186.7                           | 197.7                                   | 11.0      |
|          |         | 4.0        | 28.3          | 0.136                            | 208.6                           |                                         |           |
|          |         | 3.2        | 22.5          | 0.129                            | 175.1                           |                                         |           |
|          |         | 3.0        | 20.8          | 0.107                            | 194.3                           |                                         |           |
|          | Ir2     | 3.3        | 23.2          | 0.055                            | 422.4                           | 341.1                                   | 81.4      |
|          |         | 1.3        | 8.9           | 0.034                            | 259.7                           |                                         |           |
|          |         | 6.3        | 43.9          | 0.173                            | 254.1                           |                                         |           |
|          |         | 2.8        | 19.6          | 0.082                            | 239.4                           |                                         |           |
| 3        | Ir1     | 2.4        | 16.6          | 0.087                            | 190.1                           | 167.2                                   | 16.7      |
|          |         | 1.1        | 8.0           | 0.050                            | 160.5                           |                                         |           |
|          |         | 1.0        | 7.0           | 0.047                            | 150.9                           |                                         |           |
|          |         | 0.6        | 4.0           | 0.038                            | 105.3                           |                                         |           |
|          |         | 0.6        | 4.2           | 0.033                            | 127.3                           |                                         |           |
|          | Ir2     | 4.0        | 27.9          | 0.127                            | 220.0                           | 303.3                                   | 103.6     |
|          |         | 3.0        | 21.0          | 0.047                            | 449.3                           |                                         |           |
|          |         | 1.6        | 11.3          | 0.047                            | 240.6                           |                                         |           |
|          |         | 2.0        | 14.1          | 0.086                            | 163.0                           |                                         |           |
|          |         | 2.7        | 18.7          | 0.081                            | 230.6                           |                                         |           |

<sup>a</sup>Cells were incubated with 10  $\mu$ M of the Ir complexes.



**Table S4** Accumulation of Iridium Complexes in NIH-3T3 Cells<sup>a</sup>

| <b>Time (h)</b> | <b>Complex</b> | <b>[Ir] (ppb)</b> | <b>Total Ir (ng)</b> | <b>Total Cells (x 10<sup>6</sup>)</b> | <b>[Ir] (ng/10<sup>6</sup> cells)</b> | <b>Average [Ir] (ng/10<sup>6</sup> cells)</b> | <b>Std. Dev.</b> |
|-----------------|----------------|-------------------|----------------------|---------------------------------------|---------------------------------------|-----------------------------------------------|------------------|
| 24              | Ir1            | 25.4              | 178.1                | 0.183                                 | 971.4                                 | 858.0                                         | 103.3            |
|                 |                | 20.2              | 141.6                | 0.161                                 | 881.1                                 |                                               |                  |
|                 |                | 8.8               | 61.8                 | 0.086                                 | 721.4                                 |                                               |                  |
|                 | Ir2            | 13.0              | 91.1                 | 0.049                                 | 1860.8                                | 1380.3                                        | 340.7            |
|                 |                | 5.9               | 41.5                 | 0.037                                 | 1110.1                                |                                               |                  |
|                 |                | 6.6               | 45.9                 | 0.039                                 | 1169.9                                |                                               |                  |
| 3               | Ir1            | 7.1               | 50.0                 | 0.108                                 | 463.0                                 | 465.3                                         | 172.7            |
|                 |                | 10.5              | 73.7                 | 0.109                                 | 677.9                                 |                                               |                  |
|                 |                | 1.1               | 8.0                  | 0.031                                 | 255.0                                 |                                               |                  |
|                 | Ir2            | 9.4               | 65.9                 | 0.073                                 | 905.4                                 | 917.7                                         | 224.2            |
|                 |                | 8.8               | 61.8                 | 0.052                                 | 1198.3                                |                                               |                  |
|                 |                | 10.8              | 75.8                 | 0.117                                 | 649.5                                 |                                               |                  |

<sup>a</sup>Cells were incubated with 20  $\mu$ M of the Ir complexes.

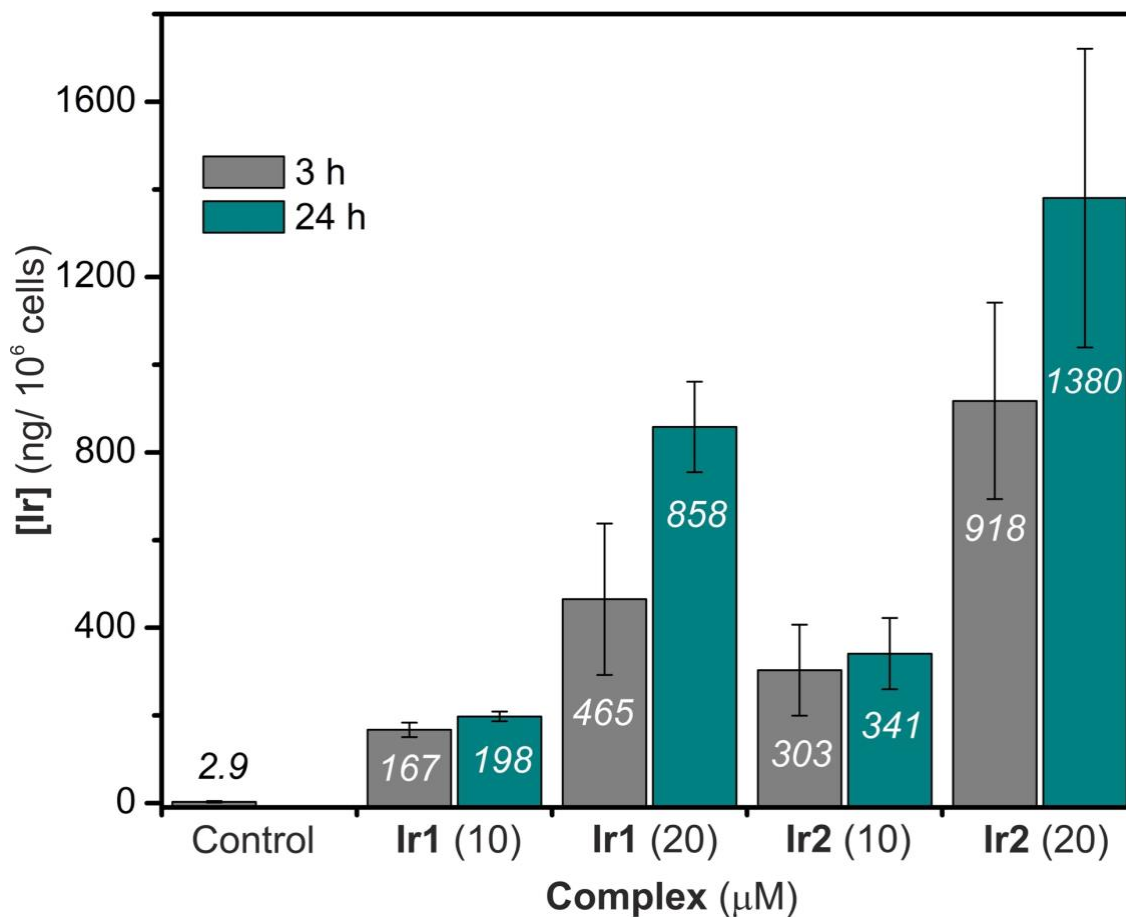

**Figure S8.** Comparing the effects of incubation time and concentration of the iridium complexes on their accumulation inside NIH-3T3 cells.

**Table S5** Accumulation of Iridium Complexes in SH-SY5Y cells<sup>a</sup>

| Time (h) | Complex | [Ir] (ppb) | Total Ir (ng) | Total Cells (x 10 <sup>6</sup> ) | [Ir] (ng/10 <sup>6</sup> cells) | Average [Ir] (ng/10 <sup>6</sup> cells) | Std. Dev. |
|----------|---------|------------|---------------|----------------------------------|---------------------------------|-----------------------------------------|-----------|
| Control  |         | 0.004      | 0.031         | 0.1680                           | 0.18                            | 0.23                                    | 0.05      |
|          |         | 0.004      | 0.030         | 0.1067                           | 0.28                            |                                         |           |
| 24       | Ir1     | 2.957      | 20.698        | 0.1177                           | 175.90                          | 168.6                                   | 39.2      |
|          |         | 1.328      | 9.295         | 0.0793                           | 117.27                          |                                         |           |
|          |         | 2.004      | 14.027        | 0.0660                           | 212.52                          |                                         |           |
|          |         | 3.520      | 24.641        | 0.1105                           | 223.07                          |                                         |           |
|          | Ir2     | 10.364     | 72.548        | 0.1667                           | 435.29                          | 488.8                                   | 53.5      |
|          |         | 10.820     | 75.740        | 0.1397                           | 542.29                          |                                         |           |
|          |         | 1.655      | 11.585        | 0.0462                           | 250.58                          |                                         |           |
|          |         | 2.481      | 17.366        | 0.0827                           | 210.07                          |                                         |           |
| 3        | Ir1     | 1.473      | 10.311        | 0.0839                           | 122.90                          | 147.9                                   | 25.1      |
|          |         | 5.457      | 38.199        | 0.2208                           | 173.00                          |                                         |           |
|          |         | 1.486      | 10.399        | 0.0787                           | 132.08                          |                                         |           |
|          | Ir2     | 2.738      | 19.166        | 0.1203                           | 159.27                          | 258.3                                   | 99.0      |
|          |         | 10.670     | 74.690        | 0.2090                           | 357.37                          |                                         |           |
|          |         | 1.636      | 11.452        | 0.0962                           | 119.04                          |                                         |           |

<sup>a</sup>Cells were incubated with 5  $\mu$ M of the Ir complexes.

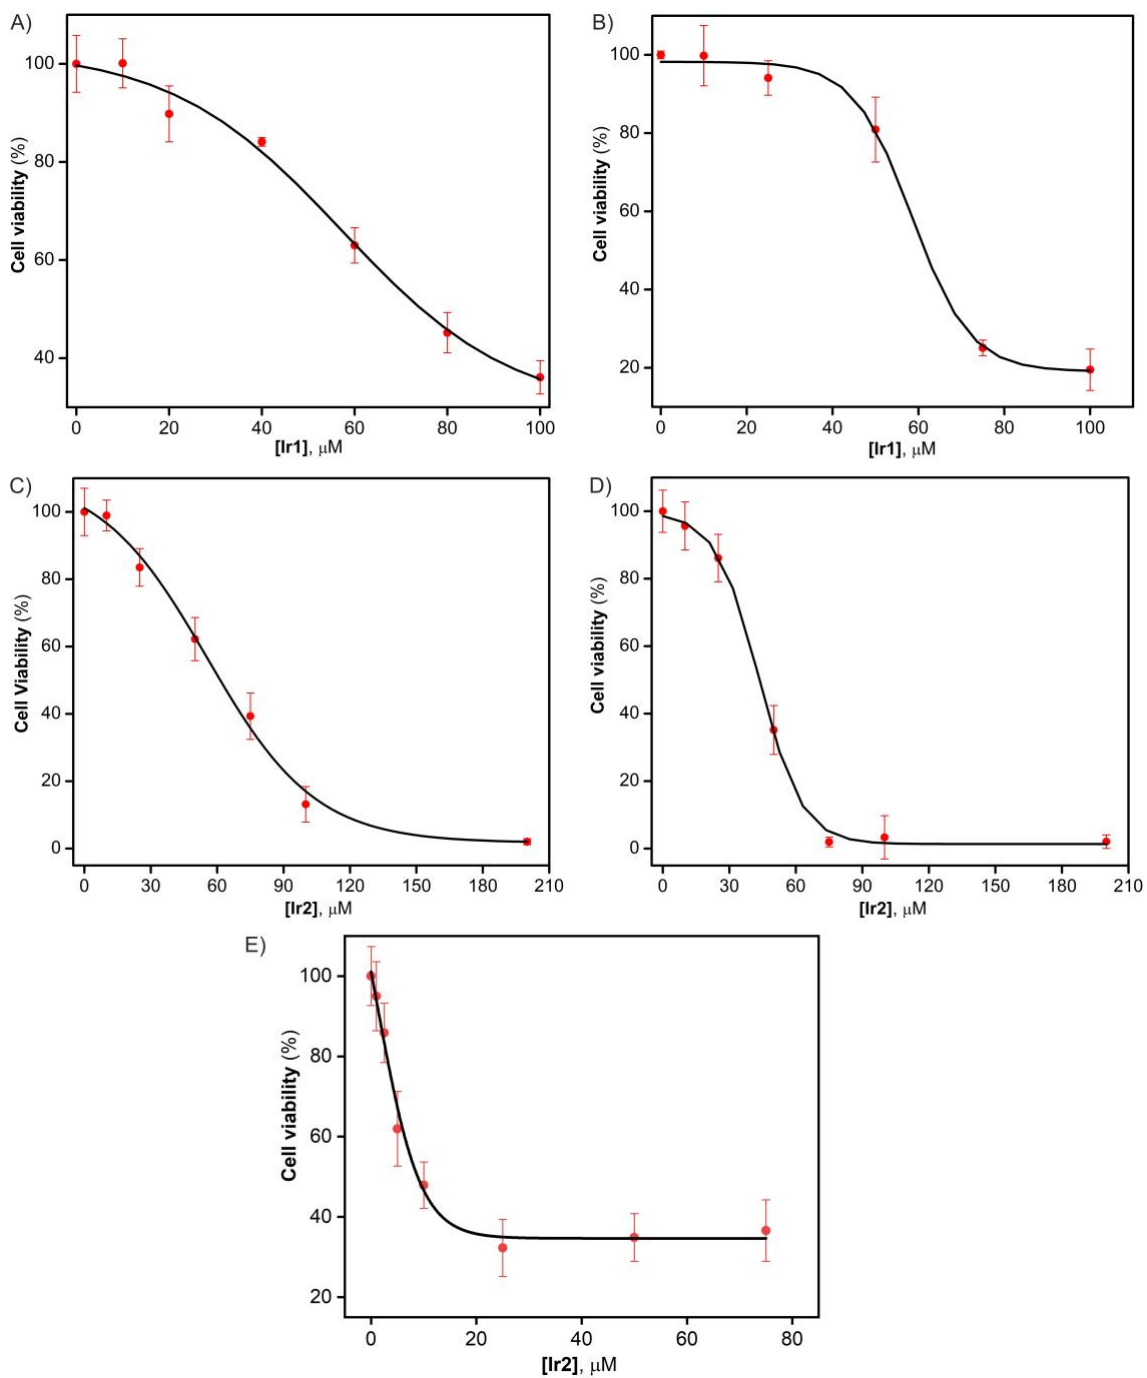

**Figure S9.** Cell viability curves obtained from incubation of NIH-3T3 cells with the iridium complexes. Treatment with A) **Ir1** for 3 h; B) **Ir1** for 24 h; C) **Ir2** for 3 h; D) **Ir2** for 24 h; and E) **Ir2** + GSH (100  $\mu\text{M}$ ) for 24 h.

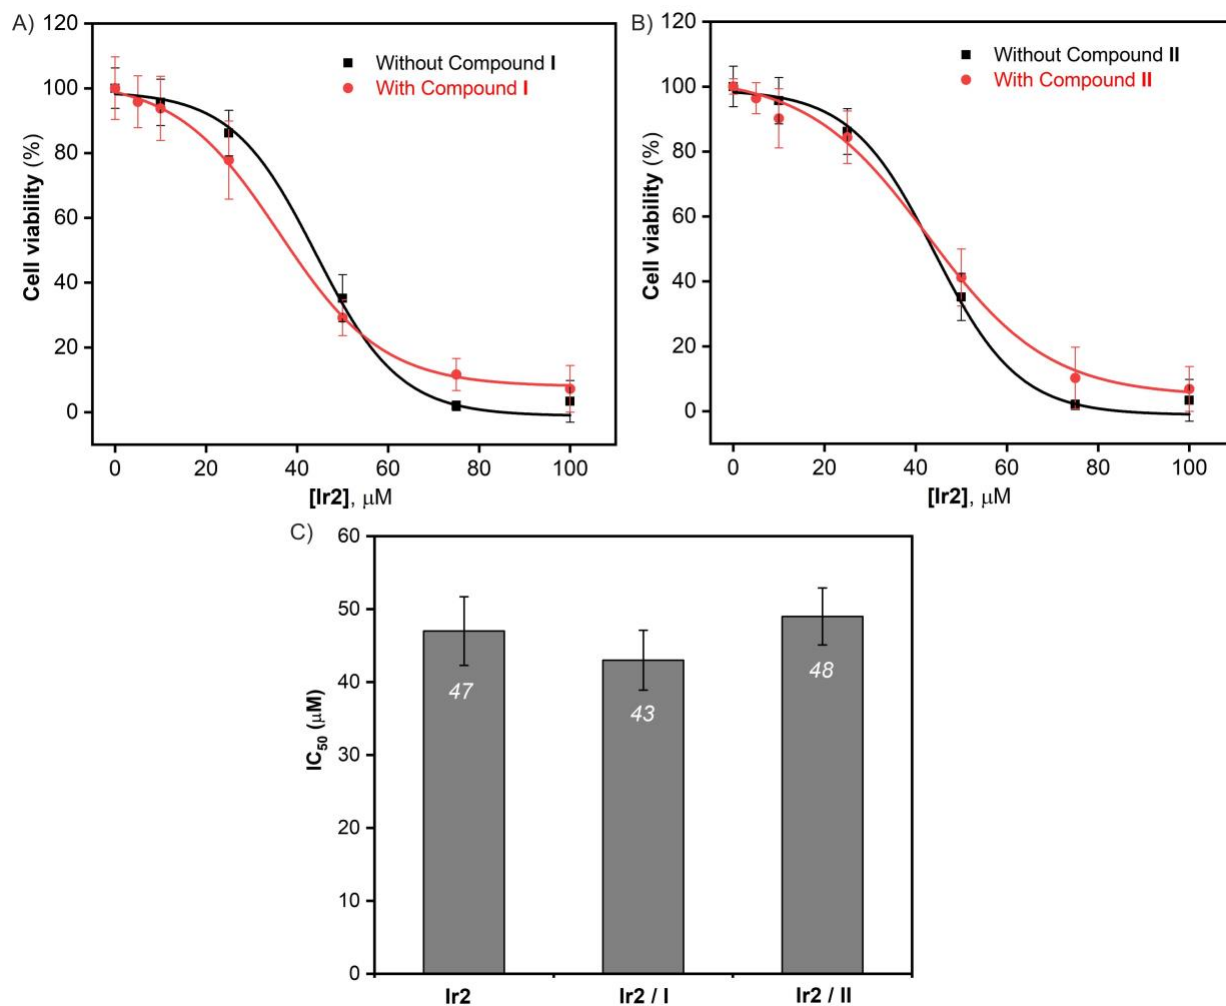

**Figure S10.** Cell viability curve obtained after incubating NIH-3T3 cells with A) **Ir2** ± **I** and B) **Ir2** ± **II** for 24 h. C) Comparison of the IC<sub>50</sub> values of **Ir2** in the presence and absence of **I** and **II** (100 μM) in NIH-3T3 cells (incubation time: 24 h).

A) NIH-3T3

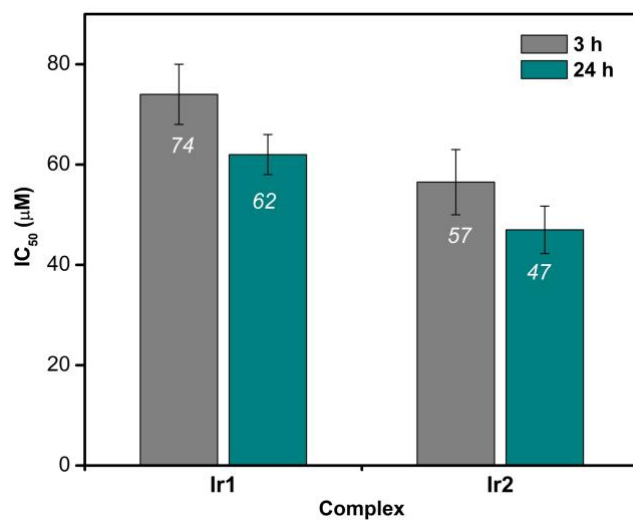

B) NIH-3T3 vs. SH-SY5Y

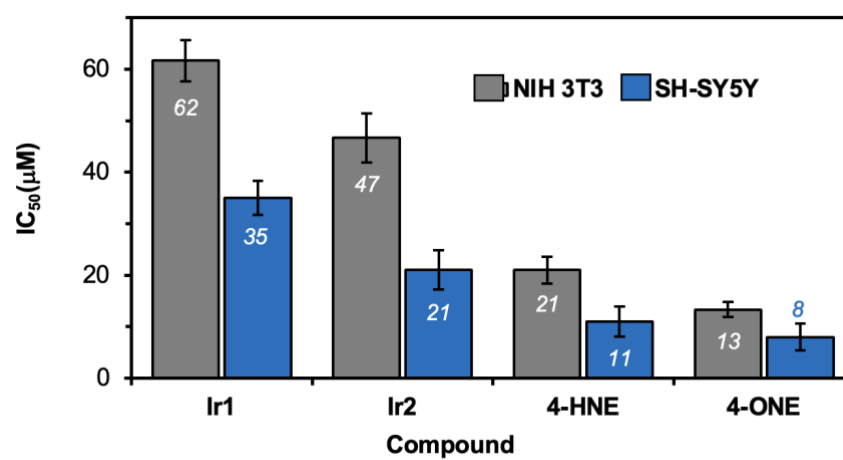

**Figure S11.** Comparing the IC<sub>50</sub> values in A) NIH-3T3 cells after treatment for 3 and 24 h; and B) NIH-3T3 vs. SH-SY5Y cells after treatment for 24 h.

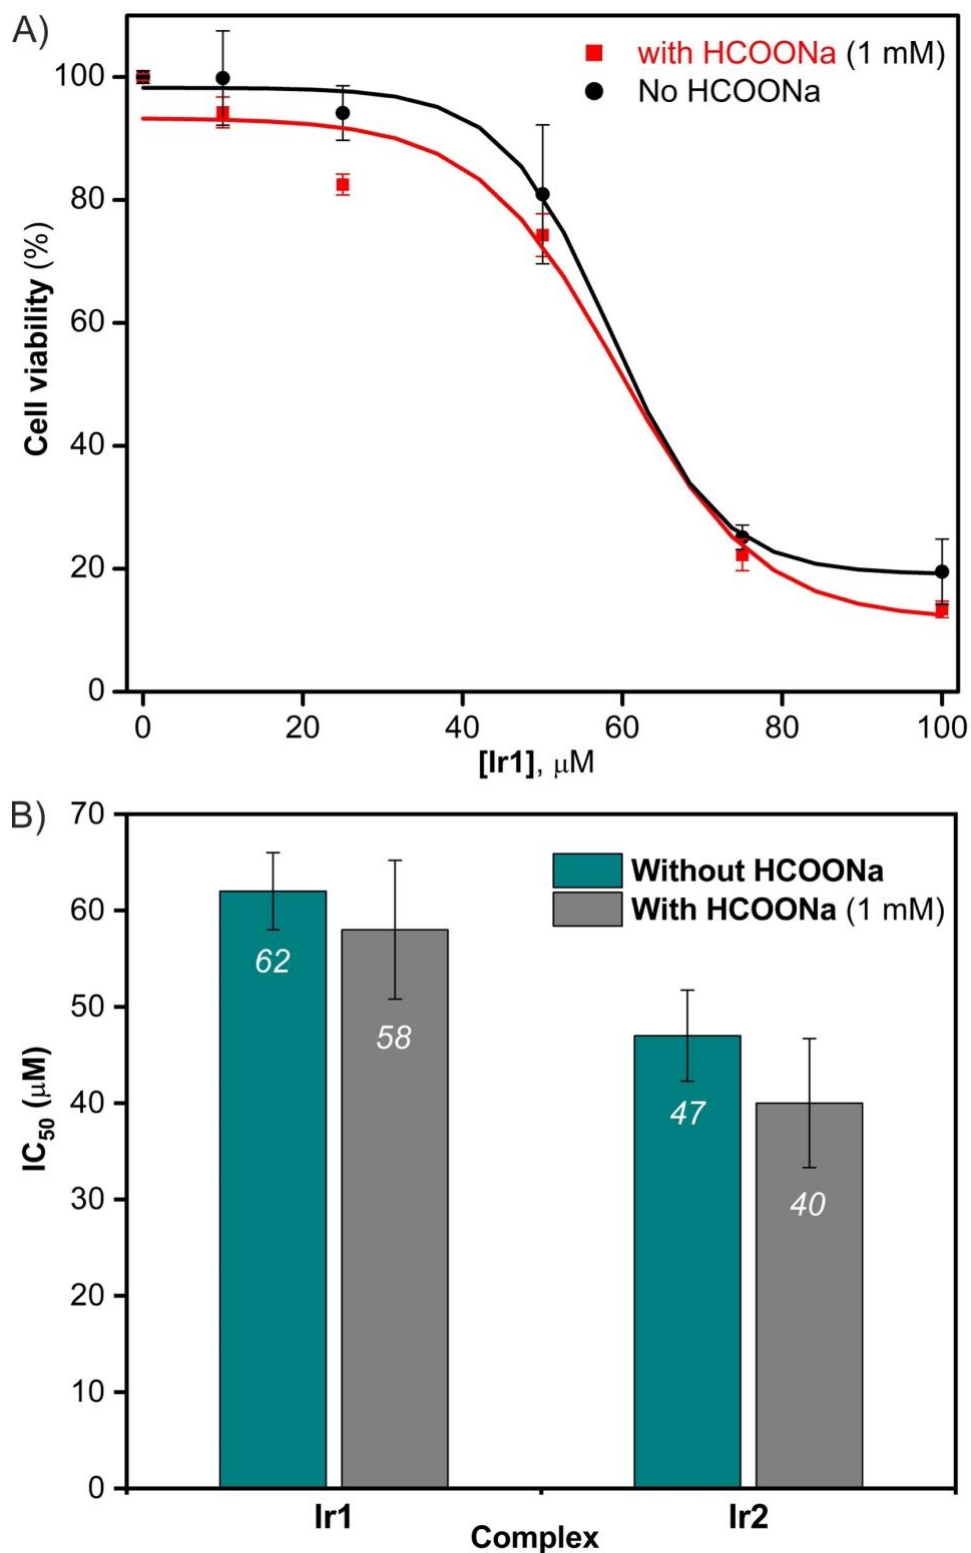

**Figure S12.** A) Cell viability curve obtained after incubating NIH-3T3 cells with Ir1  $\pm$  HCOONa for 24 h. B) Comparison of the IC<sub>50</sub> values of iridium complexes in the presence and absence of HCOONa (1mM) in NIH-3T3 cells (incubation time: 24 h).

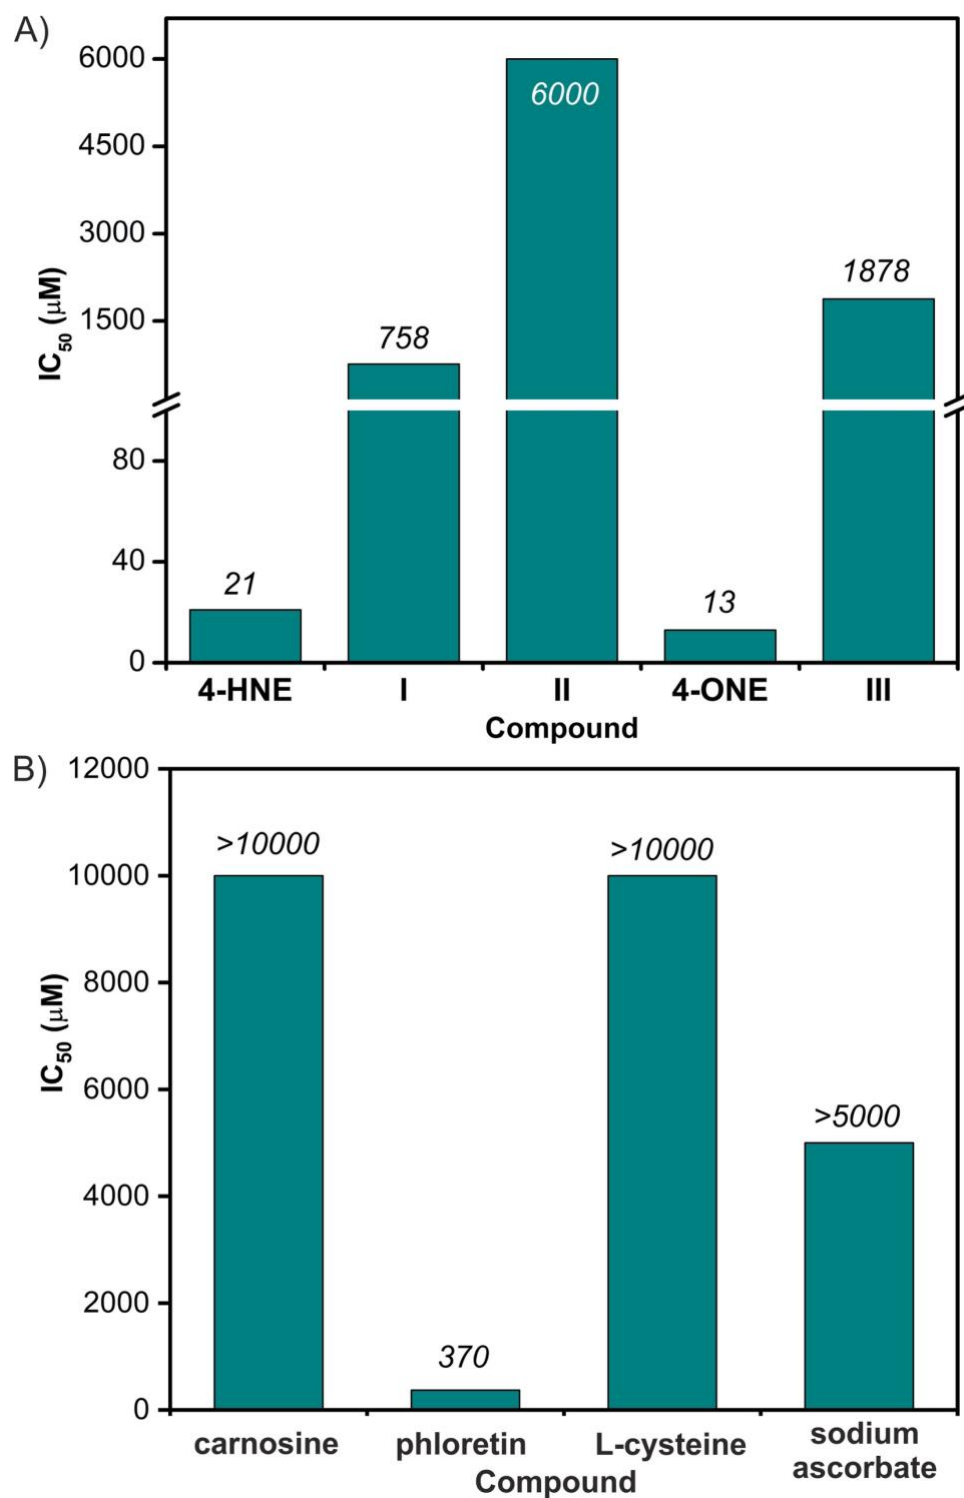

**Figure S13.** Comparison of the IC<sub>50</sub> values (24 h incubation) of aldehydes, alcohol, and aldehyde scavengers in NIH-3T3 cells: A) Aldehydes 4-HNE and 4-ONE and alcohols I, II, and III; B) aldehyde scavengers carnosine, phloretin, L-cysteine, and sodium ascorbate.



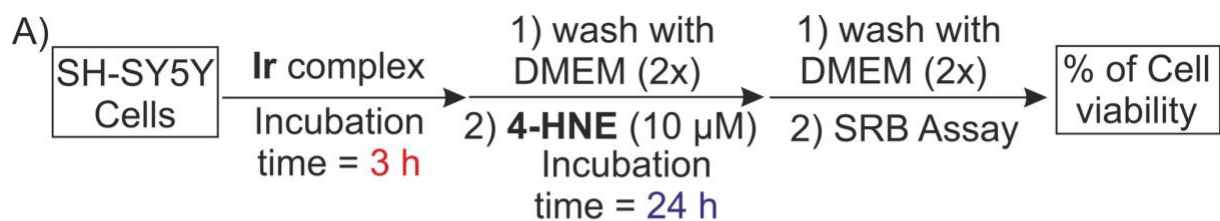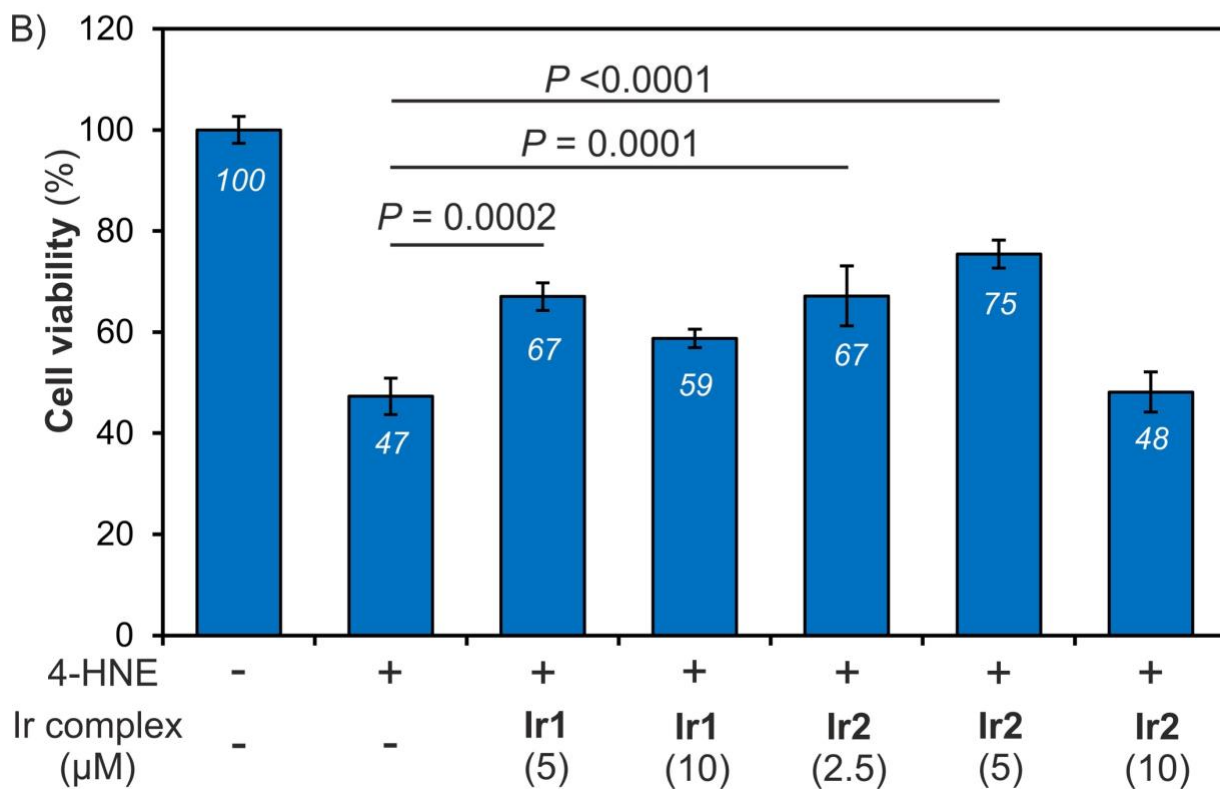

**Figure S14.** A) Experimental procedure for 4-HNE detoxification in SH-SY5Y cells. B) Effect of iridium complexes on SH-SY5Y cell viability in the presence of 4-HNE (10 μM). Treatment conditions: Ir complex (2.5, 5, or 10 μM), and 4-HNE (10 μM). The data were analyzed using one-way ANOVA and shown as the mean ± standard deviation ( $n = 6$  per group).

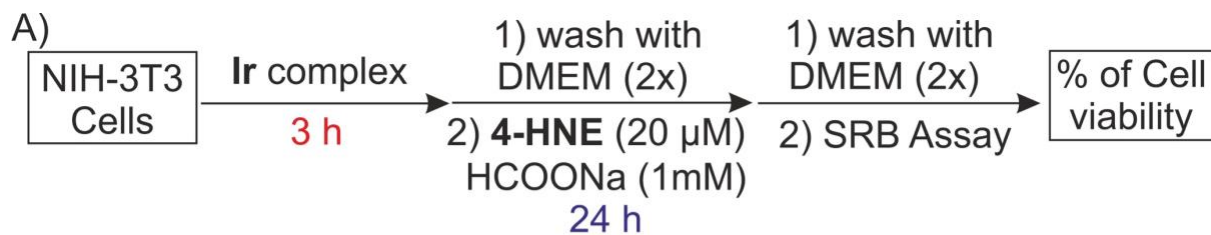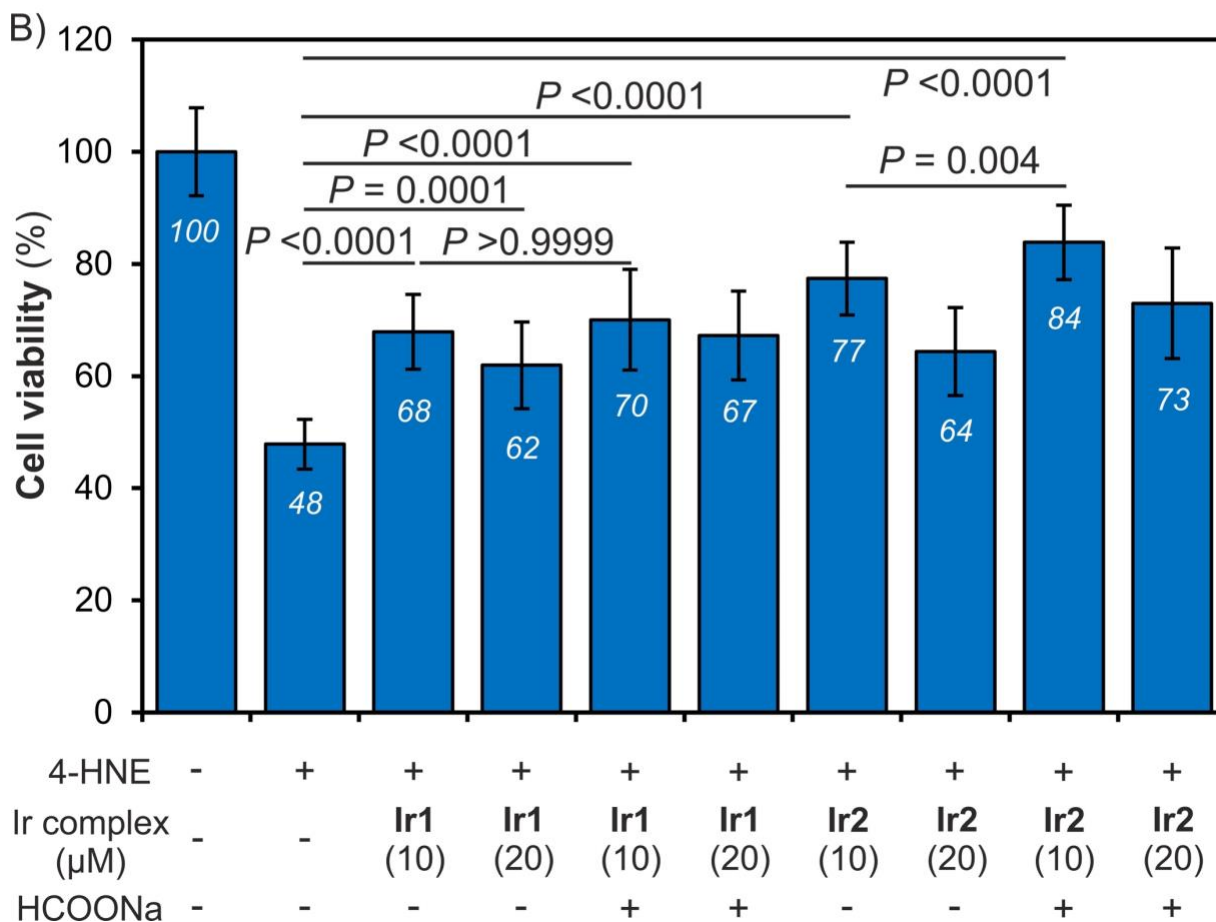

**Figure S15.** A) Experimental procedure for 4-HNE detoxification in NIH-3T3 cells. B) Effect of iridium complexes with or without HCOONa on NIH-3T3 cell viability in the presence of 4-HNE (20  $\mu$ M). Treatment conditions: Ir complex (10 or 20  $\mu$ M), 4-HNE (20  $\mu$ M), and HCOONa (1 mM). The data were analyzed using one-way ANOVA and shown as the mean  $\pm$  standard deviation ( $n = 6$  per group).

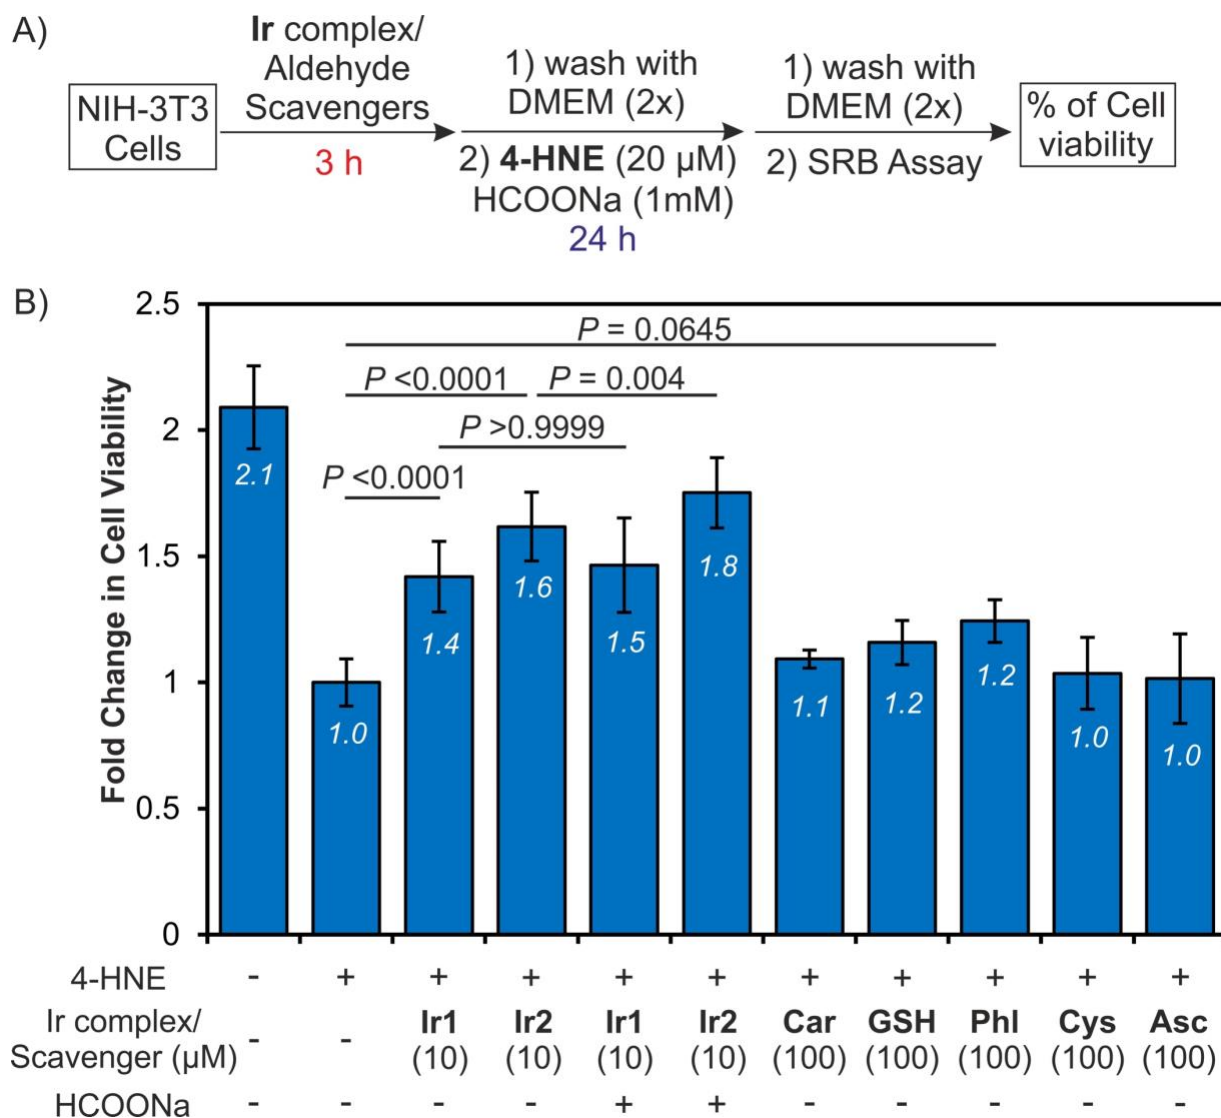

**Figure S16.** A) Experimental procedure for 4-HNE detoxification in NIH-3T3 cells. B) Comparison of the effects of the iridium complexes and aldehyde scavengers on the viability of NIH-3T3 cells after treatment with 4-HNE (20 μM). Treatment conditions: Ir complex (10 μM) or aldehyde scavengers (100 μM), and HCOONa (1mM). The fold change in cell viability was calculated as the ratio of the percentage of viable cells in treated wells divided by the percentage of viable cells in negative control wells containing only 4-HNE. The data were analyzed using one-way ANOVA and shown as the mean ± standard deviation ( $n = 6$  per group). Abbreviations: Car = carnosine, GSH = reduced glutathione, Phl = phloretin, Cys = L-cysteine, Asc = sodium ascorbate.

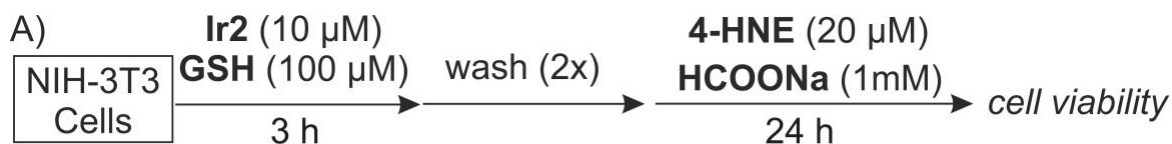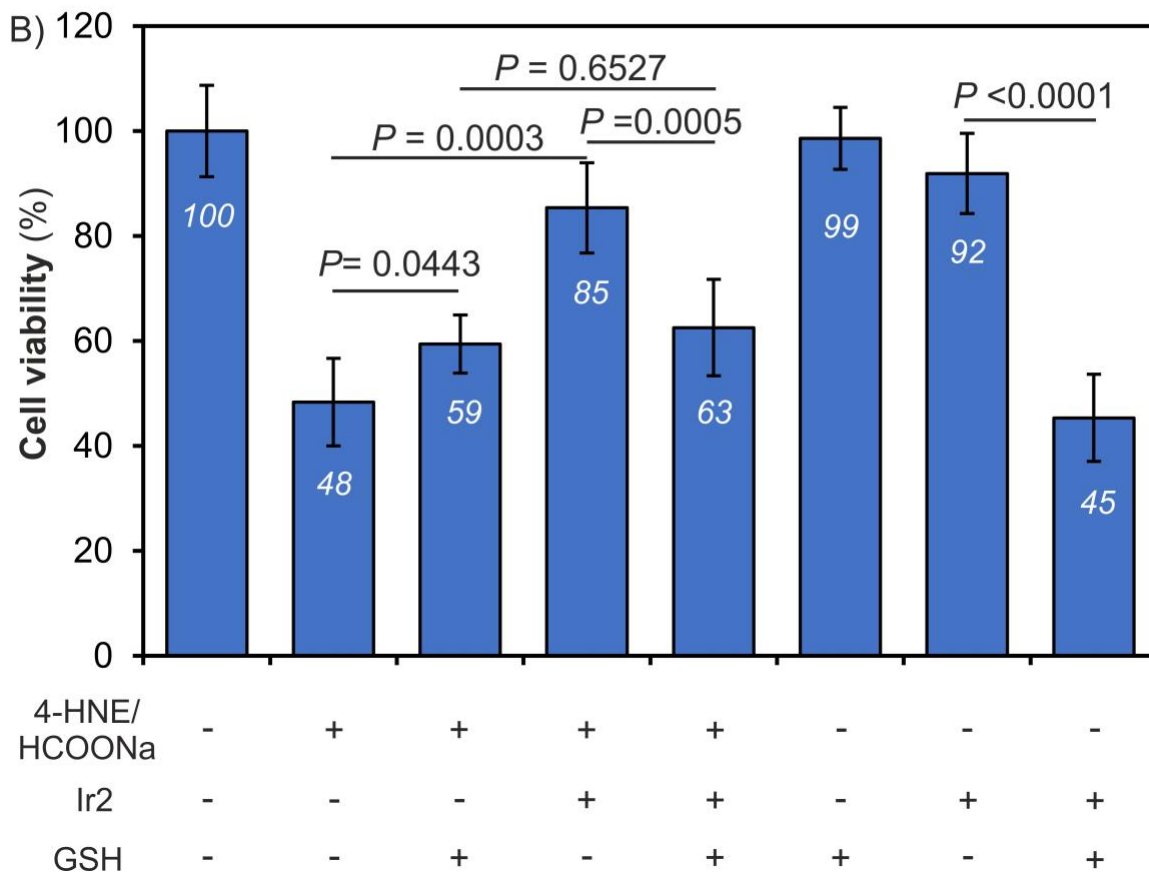

**Figure S17.** A) Experimental procedure for 4-HNE detoxification in NIH-3T3 cells with and without GSH. B) Comparison of the effects of the iridium complexes and Ir with and without GSH on the viability of NIH-3T3 cells after treatment with 4-HNE (20  $\mu$ M). Treatment conditions: Ir complex (10  $\mu$ M), GSH (100  $\mu$ M) and HCOONa (1mM). The fold change in cell viability was calculated as the ratio of the percentage of viable cells in treated wells divided by the percentage of viable cells in negative control wells containing only 4-HNE. The data were analyzed using one-way ANOVA and shown as the mean  $\pm$  standard deviation ( $n = 6$  per group).

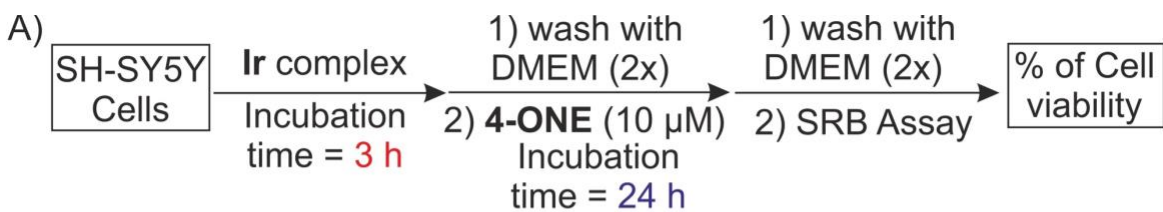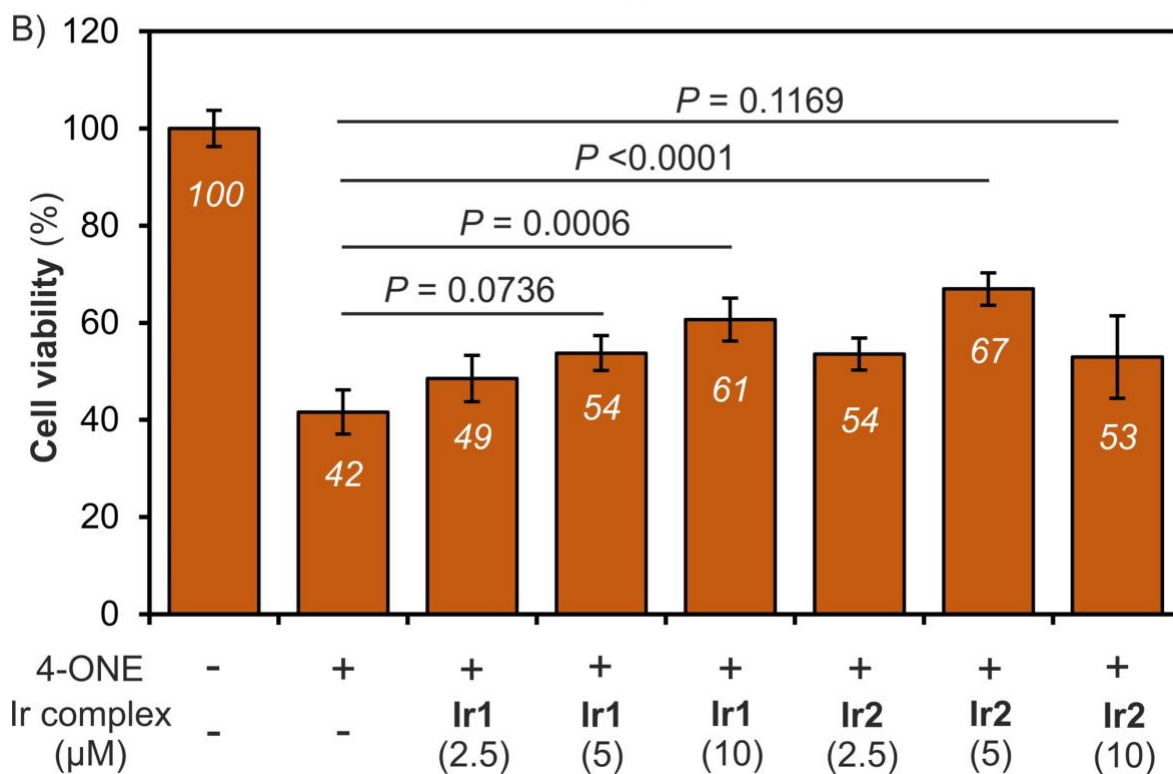

**Figure S18.** A) Experimental procedure for 4-ONE detoxification in SH-SY5Y cells. B) Effect of iridium complexes on SH-SY5Y cell viability in the presence of 4-ONE (10 μM). Treatment conditions: Ir complex (2.5, 5, or 10 μM), and 4-ONE (10 μM). The data were analyzed using one-way ANOVA and shown as the mean ± standard deviation ( $n = 6$  per group).

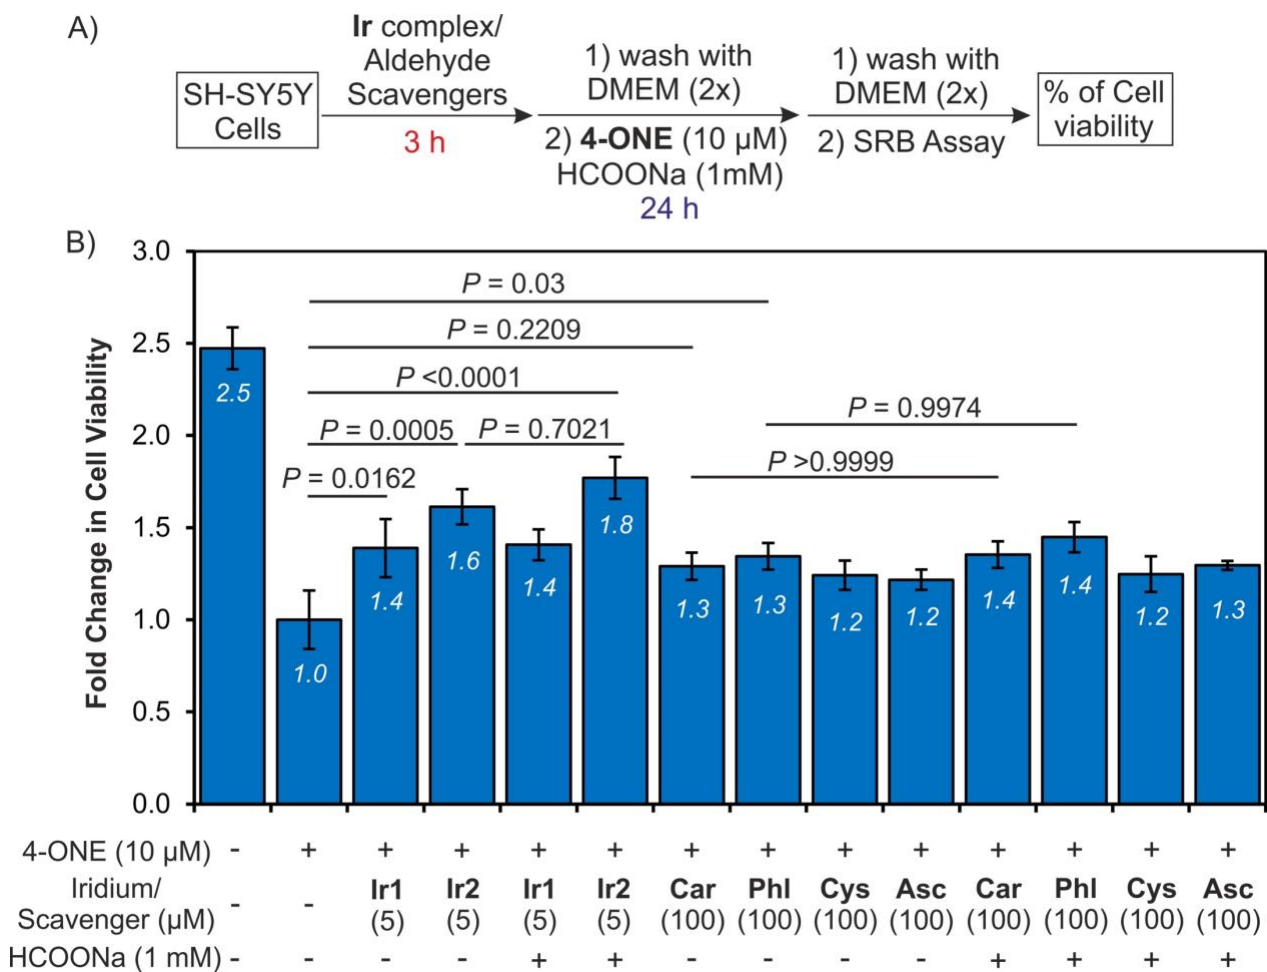

**Figure S19.** A) Experimental procedure for 4-ONE detoxification in SH-SY5Y cells. B) Comparison of the effects of iridium complexes and aldehyde scavengers on the viability of SH-SY5Y cells after exposure to 4-ONE (10 µM). Treatment conditions: Ir complex (5 µM), aldehyde scavengers (100 µM), and HCOONa (1 mM). The fold change in cell viability was calculated as the ratio of the viable cells % in treated wells divided by the viable cells % in negative control wells containing only 4-ONE. The data were analyzed using one-way ANOVA and shown as the mean  $\pm$  standard deviation ( $n = 6$  per group). Abbreviations: Car = carnosine, GSH = reduced glutathione, Phl = phloretin, Cys = L-cysteine, Asc = sodium ascorbate.

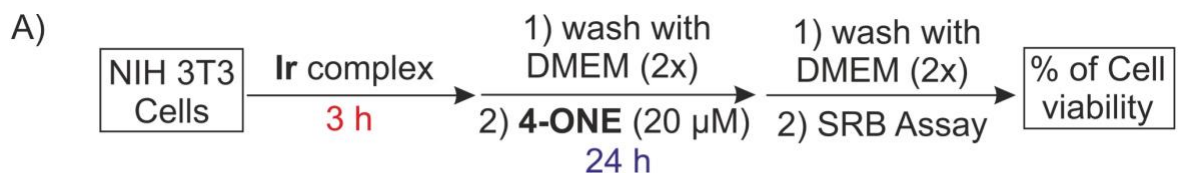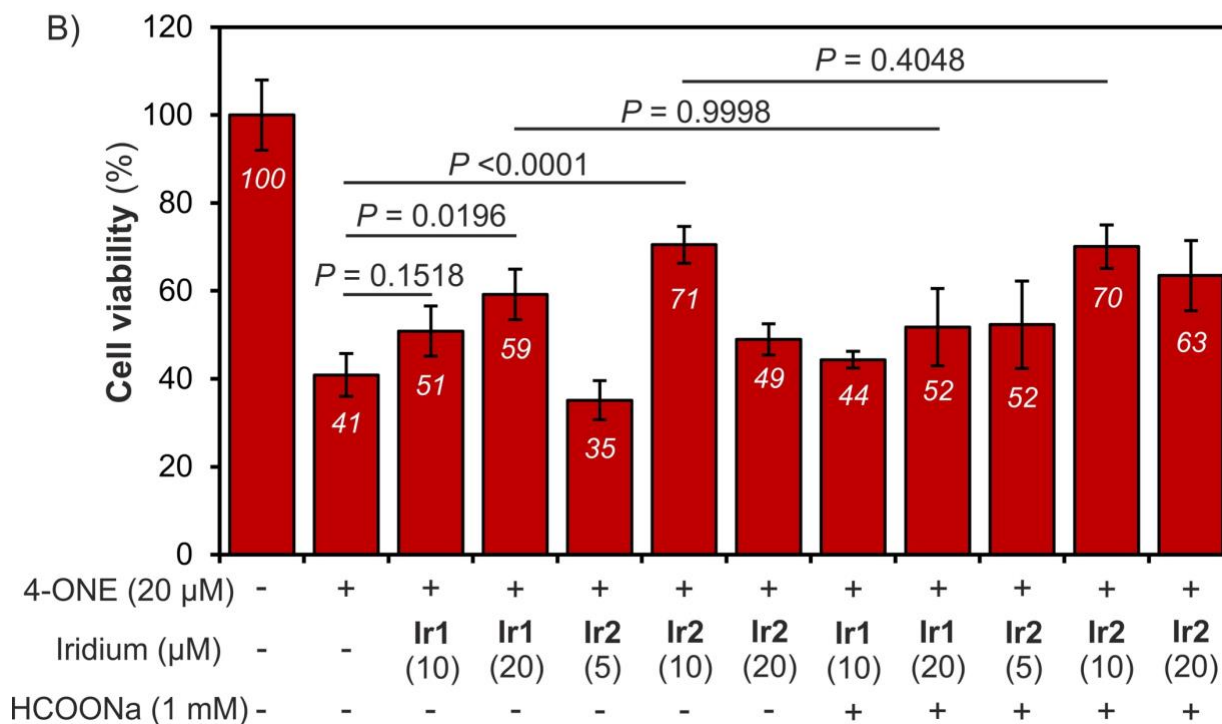

**Figure S20.** A) Experimental procedure for 4-ONE detoxification in NIH-3T3 cells. B) Effect of iridium complexes on NIH-3T3 cell viability in the presence of 4-ONE (20 μM). Treatment conditions: Ir complex (5, 10, or 20 μM), and HCOONa (1 mM). The fold change was calculated as the ratio of viable cells % in treated wells divided by the viable cells % in negative control wells containing only 4-ONE. The data were analyzed using one-way ANOVA and shown as the mean ± standard deviation ( $n = 6$  per group).

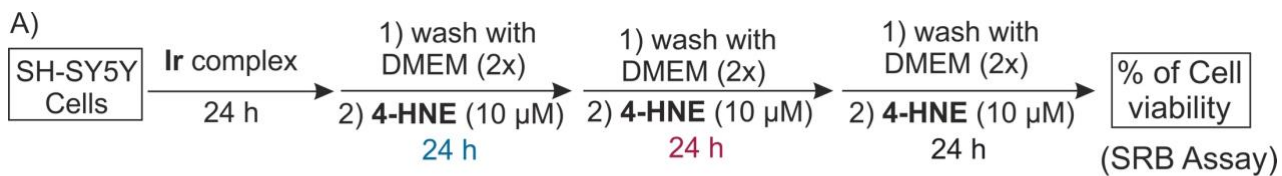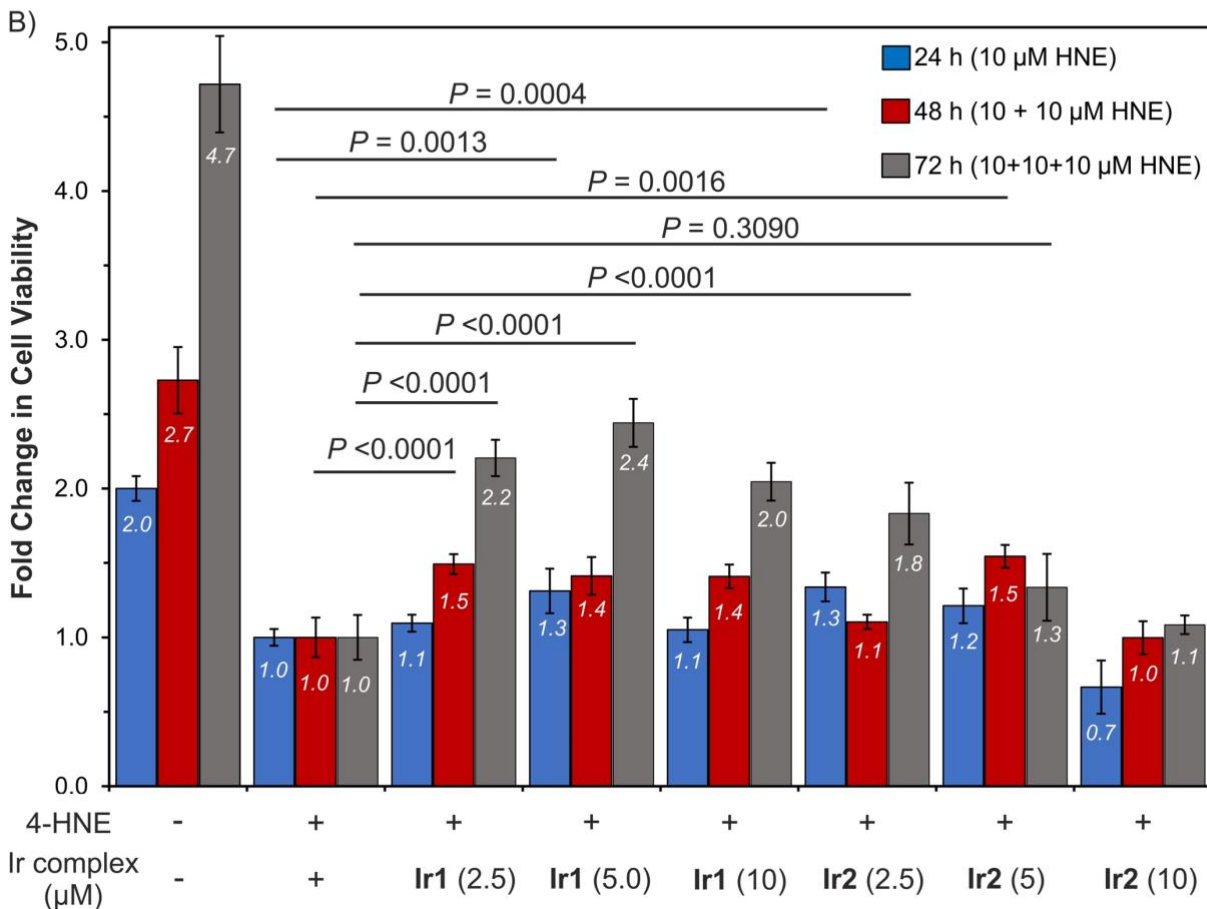

**Figure S21.** A) Experimental procedure for aldehyde detoxification after incubating SH-SY5Y cells with 4-HNE for three consecutive days. B) Effect of iridium complexes on SH-SY5Y cells after repeated exposure to 10 μM of 4-HNE. The fold change was measured after 24 h (blue), 48 h (red), and 72 h (gray). The fold change was calculated as the ratio of viable cells % in treated wells divided by the viable cells % in negative control wells containing only 4-HNE. The data were analyzed using one-way ANOVA and shown as the mean ± standard deviation ( $n = 6$  per group).



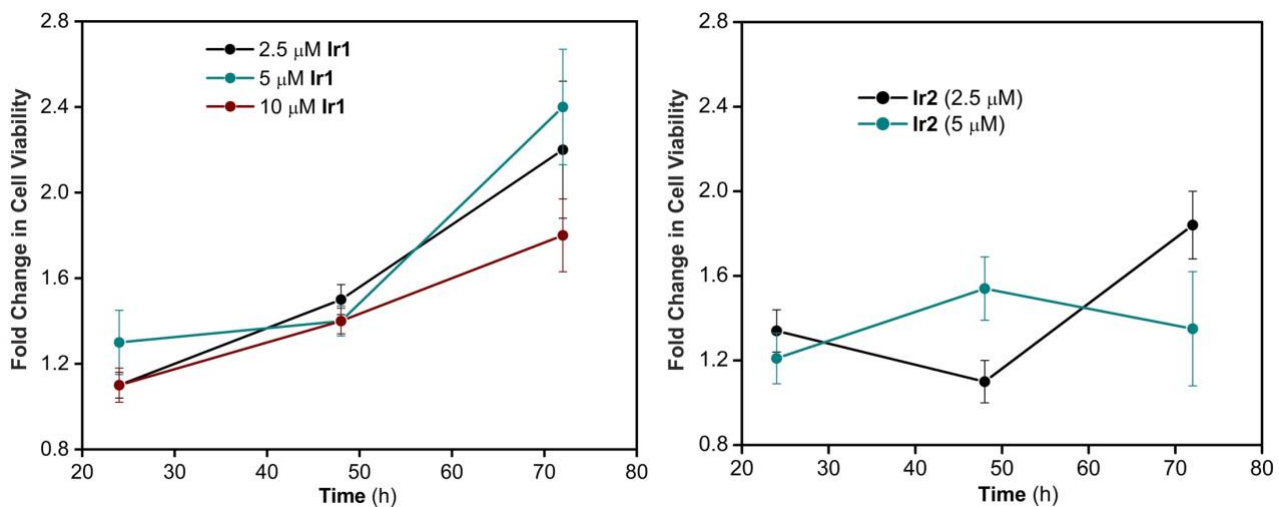

**Figure S22.** Comparing the ability of the iridium complexes to protect SH-SY5Y cells against repeated exposure to 4-HNE. It was observed that cells treated with lower concentrations of Ir exhibited greater viability after 72 h compared to those treated with higher concentrations. The data are shown as the mean  $\pm$  standard deviation ( $n = 6$  per group).

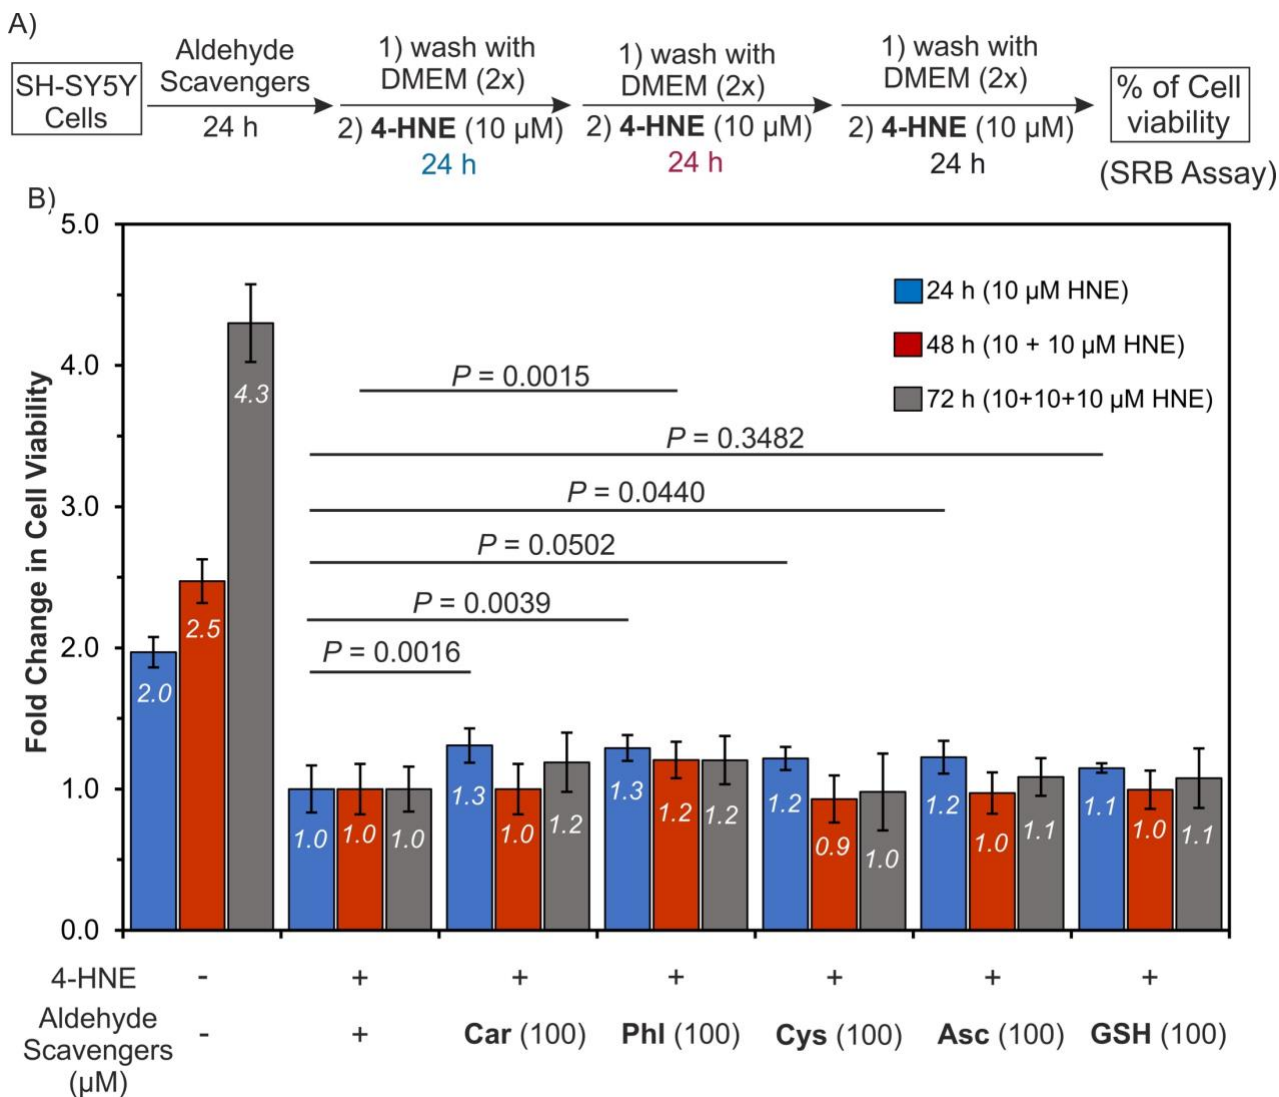

**Figure S23.** A) Experimental procedure for aldehyde detoxification after incubating SH-SY5Y cells with 4-HNE for three consecutive days. B) Effect of aldehyde scavengers (100 µM) on SH-SY5Y cells after repeated exposure to 10 µM of 4-HNE. The fold change was measured after 24 h (blue), 48 h (red), and 72 h (gray). The fold change was calculated as the ratio of viable cells % in treated wells divided by the viable cells % in negative control wells containing only 4-HNE. The data were analyzed using one-way ANOVA and shown as the mean  $\pm$  standard deviation ( $n = 6$  per group). Abbreviations: Car = carnosine, GSH = reduced glutathione, Phl = phloretin, Cys = L-cysteine, Asc = sodium ascorbate.

### Characterization Data

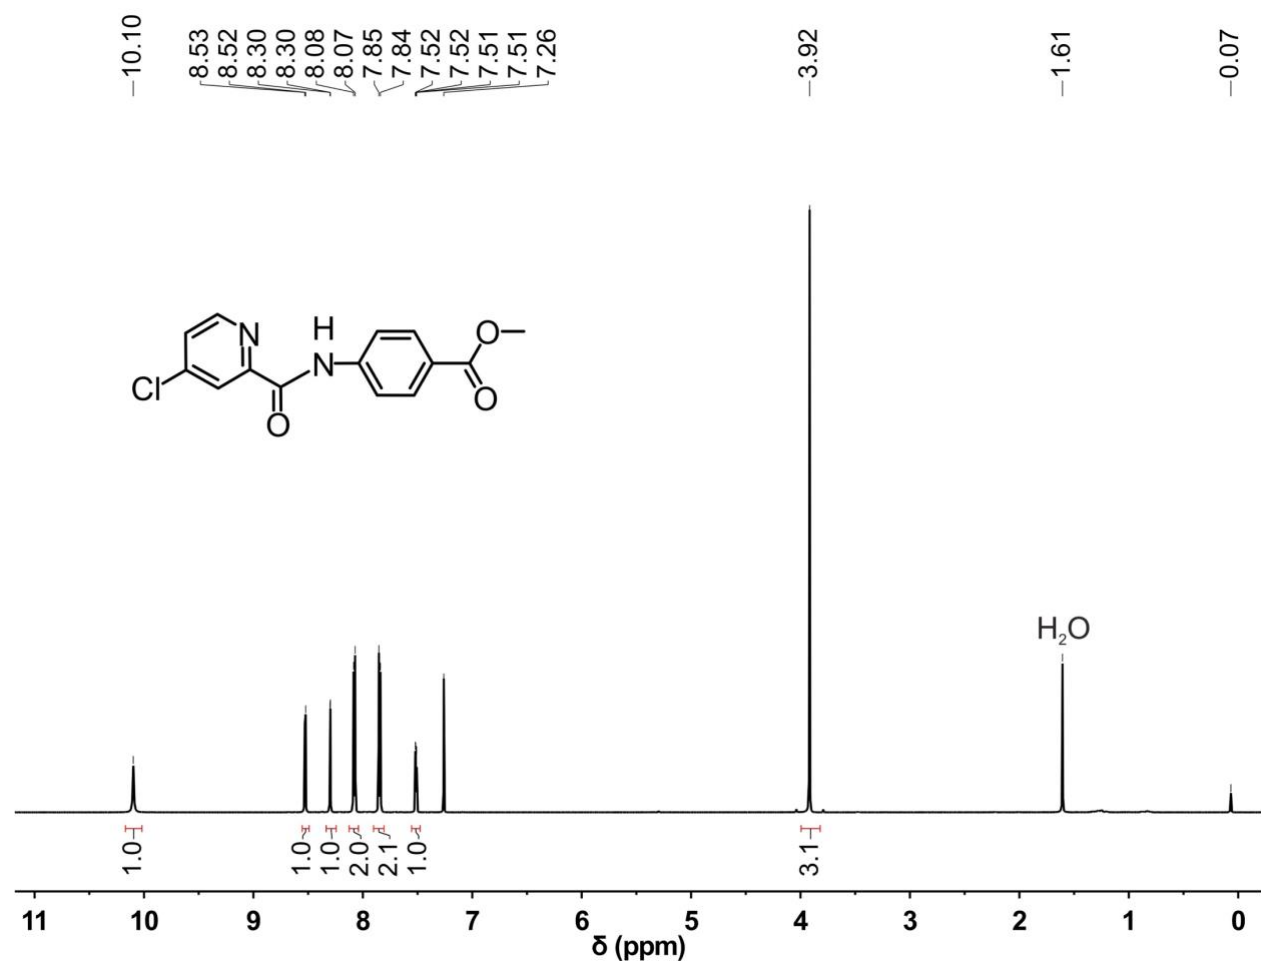

**Figure S24.** <sup>1</sup>H NMR spectrum (CDCl<sub>3</sub>, 600 MHz) of 1.

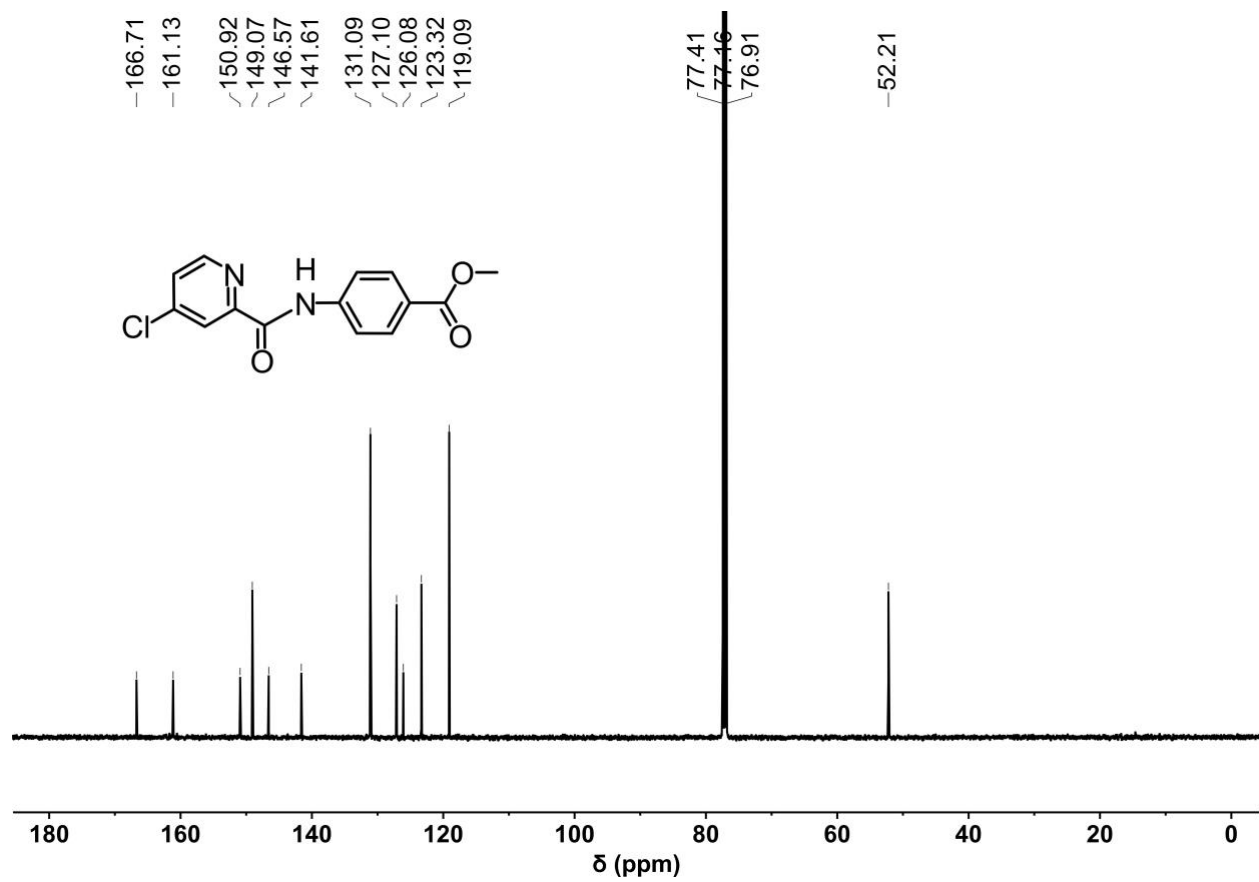

Figure S25. <sup>13</sup>C NMR spectrum (CDCl<sub>3</sub>, 126 MHz) of 1.

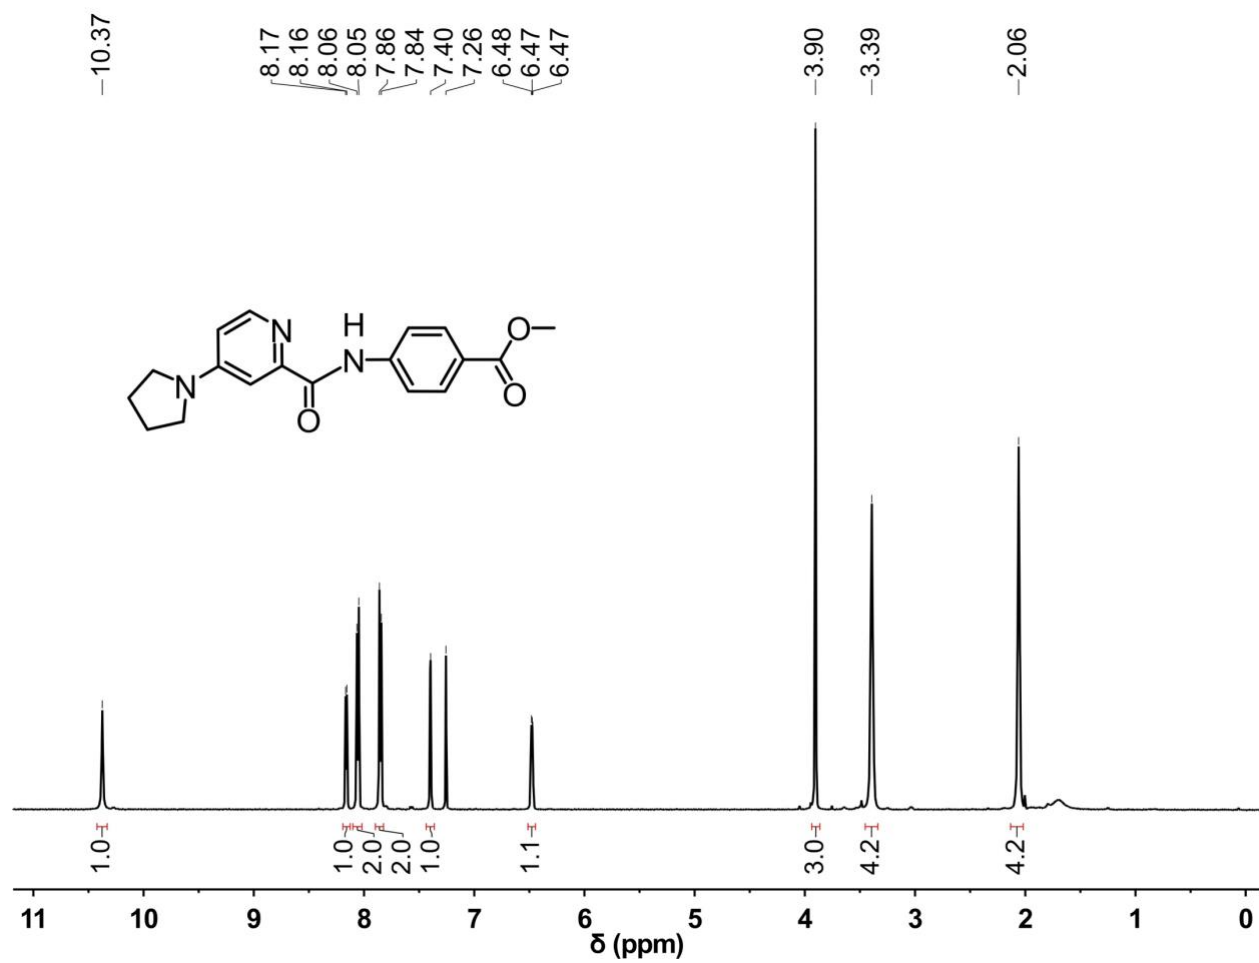

Figure S26. <sup>1</sup>H NMR spectrum (CDCl<sub>3</sub>, 600 MHz) of L2.

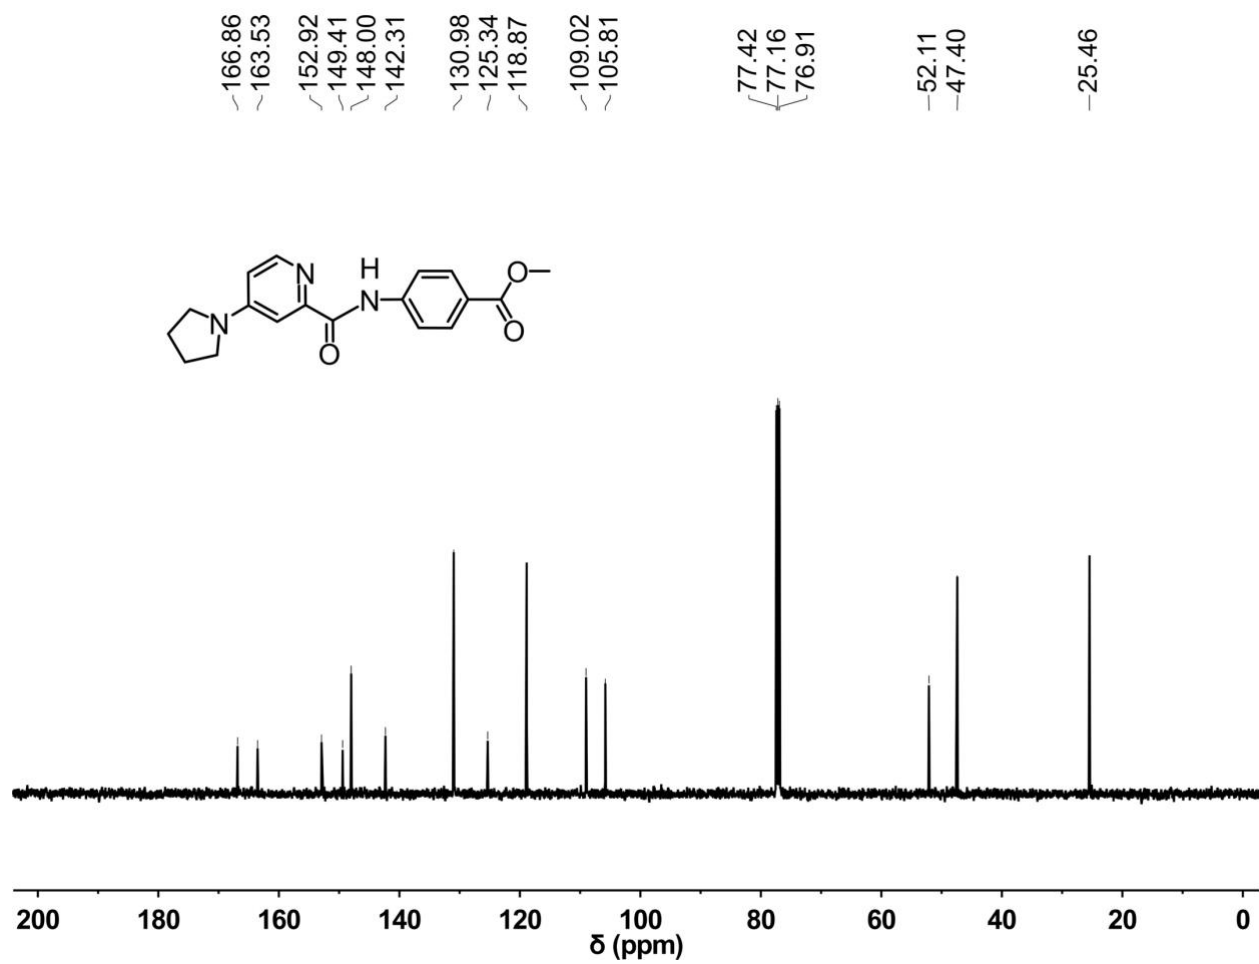

**Figure S27.**  $^{13}\text{C}$  NMR spectrum (CDCl<sub>3</sub>, 126 MHz) of L2.

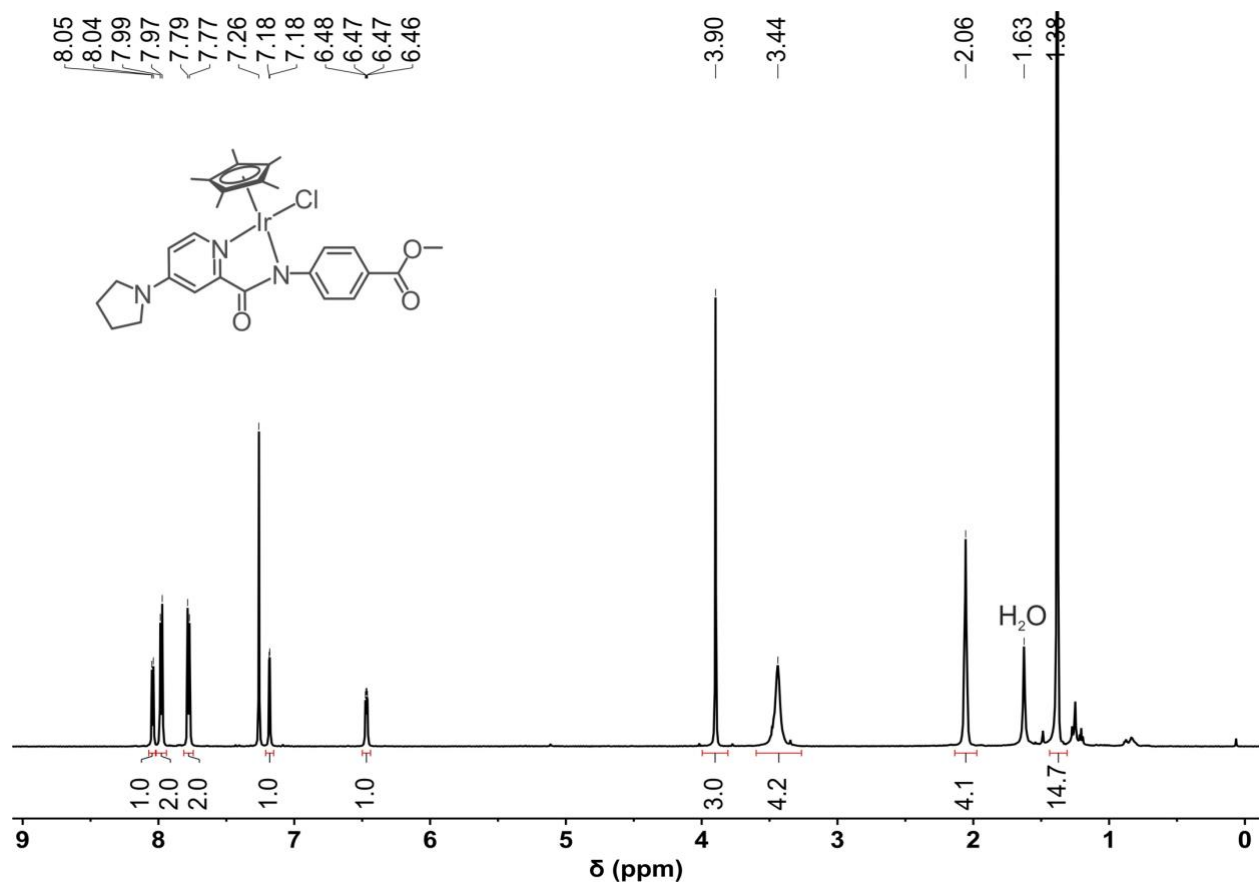

**Figure S28.** <sup>1</sup>H NMR spectrum (CDCl<sub>3</sub>, 400 MHz) of Ir2.

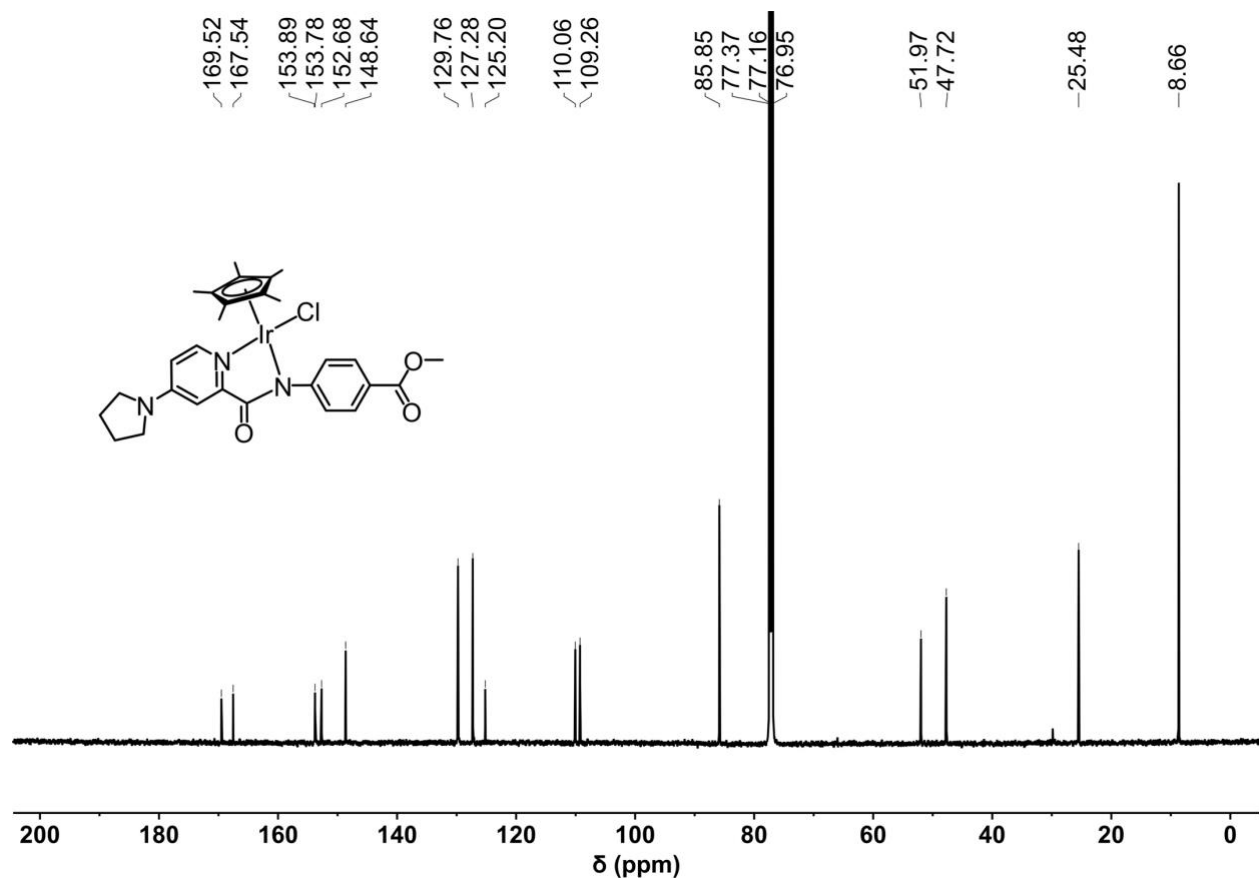

**Figure S29.** <sup>13</sup>C NMR spectrum (CDCl<sub>3</sub>, 151 MHz) of Ir2.



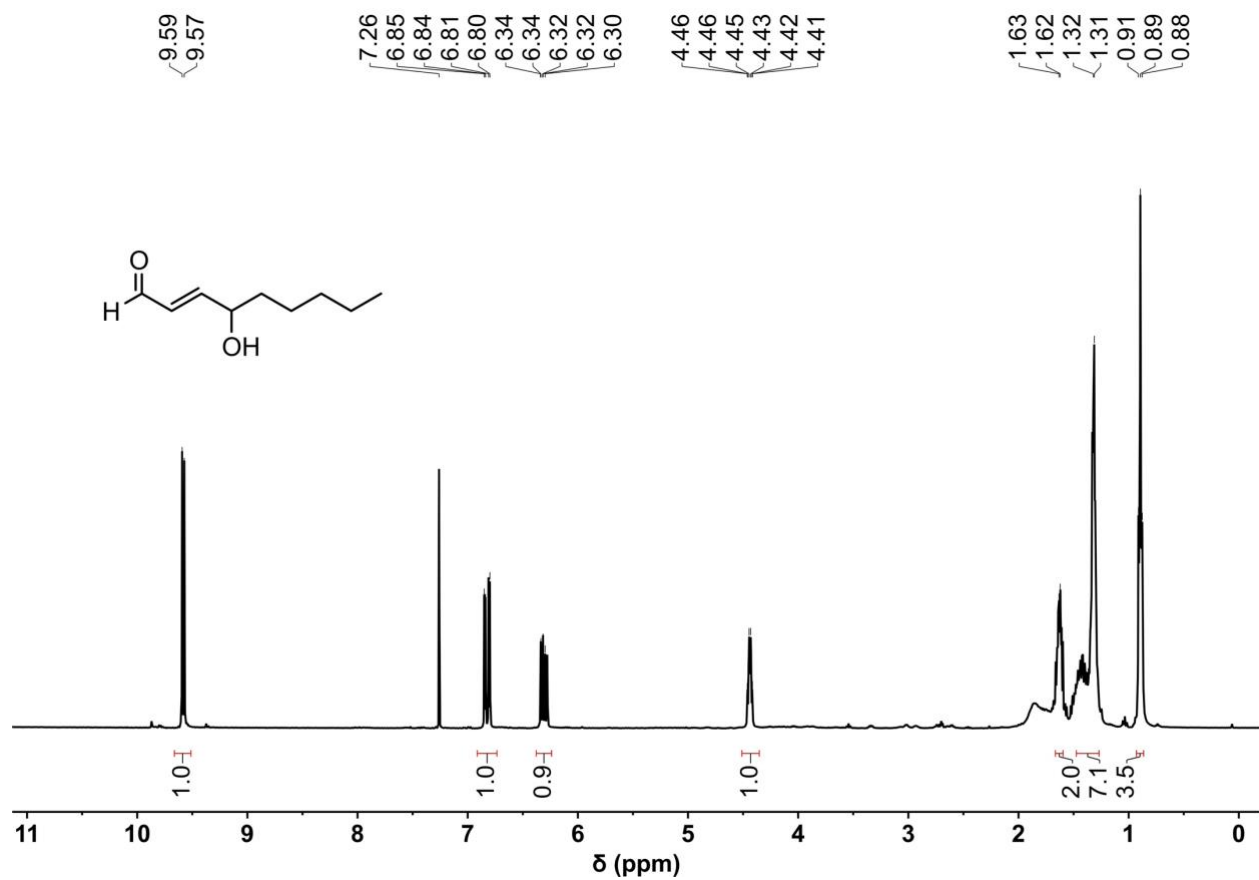

**Figure S30.**  $^1\text{H}$  NMR spectrum (CDCl<sub>3</sub>, 400 MHz) of 4-HNE.

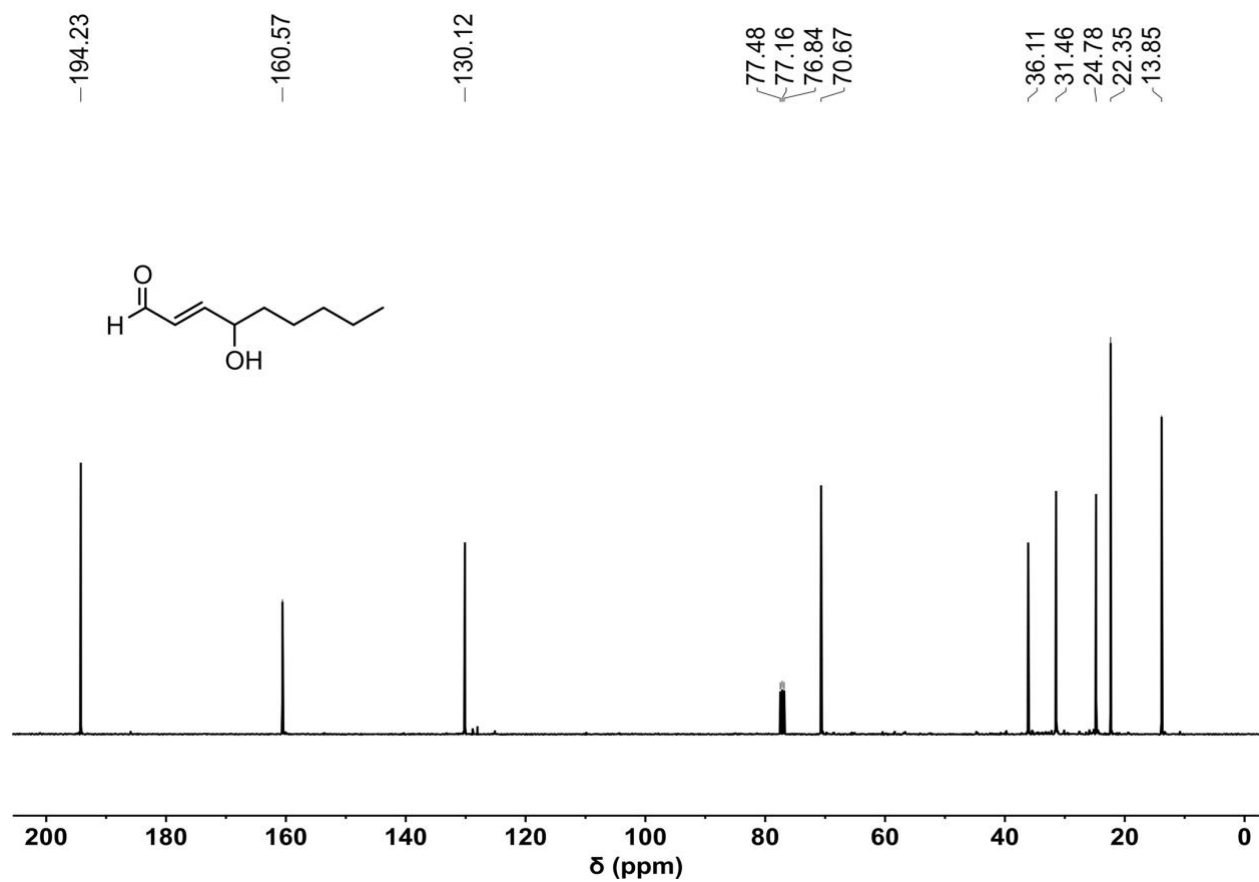

**Figure S31.** <sup>13</sup>C NMR spectrum (CDCl<sub>3</sub>, 101 MHz) of 4-HNE.

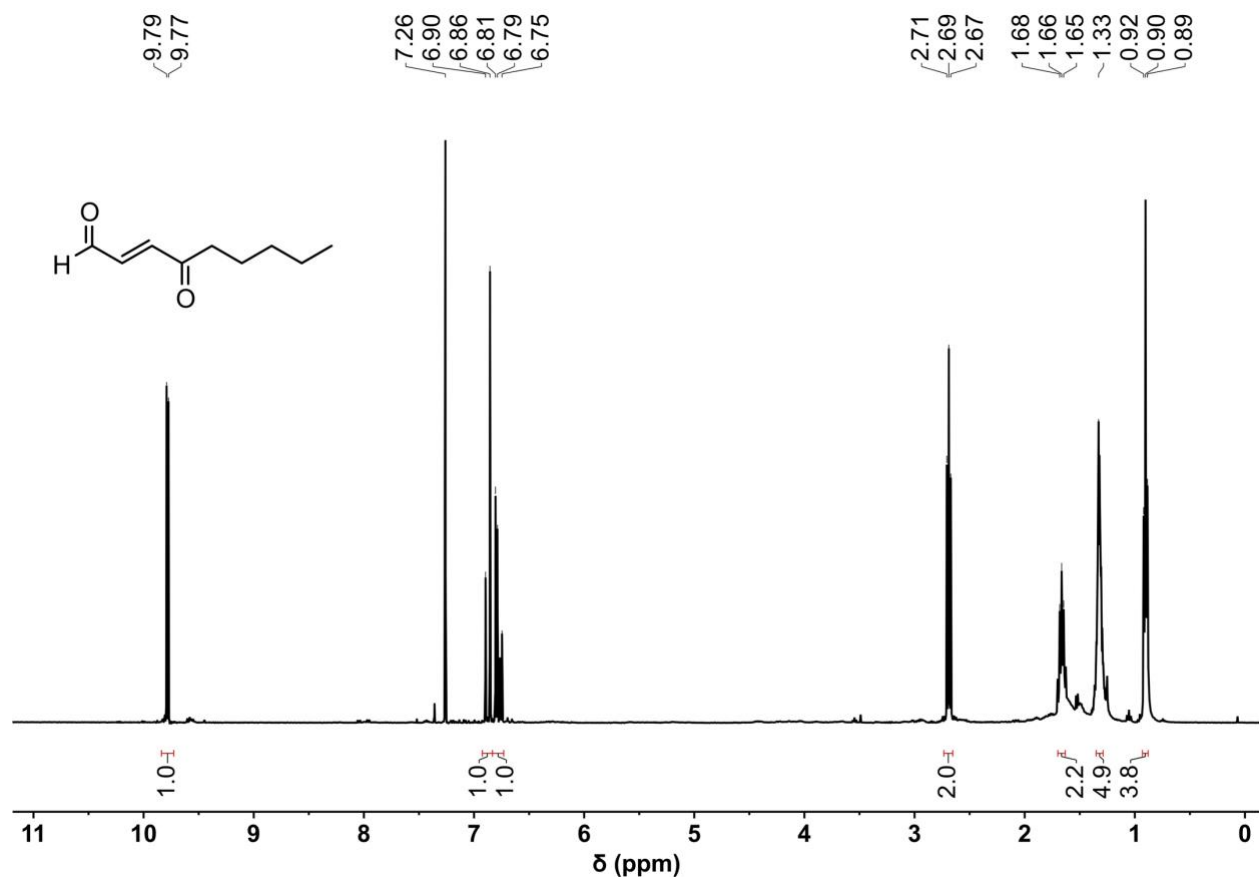

Figure S32.  $^1\text{H}$  NMR spectrum ( $\text{CDCl}_3$ , 400 MHz) of 4-ONE.

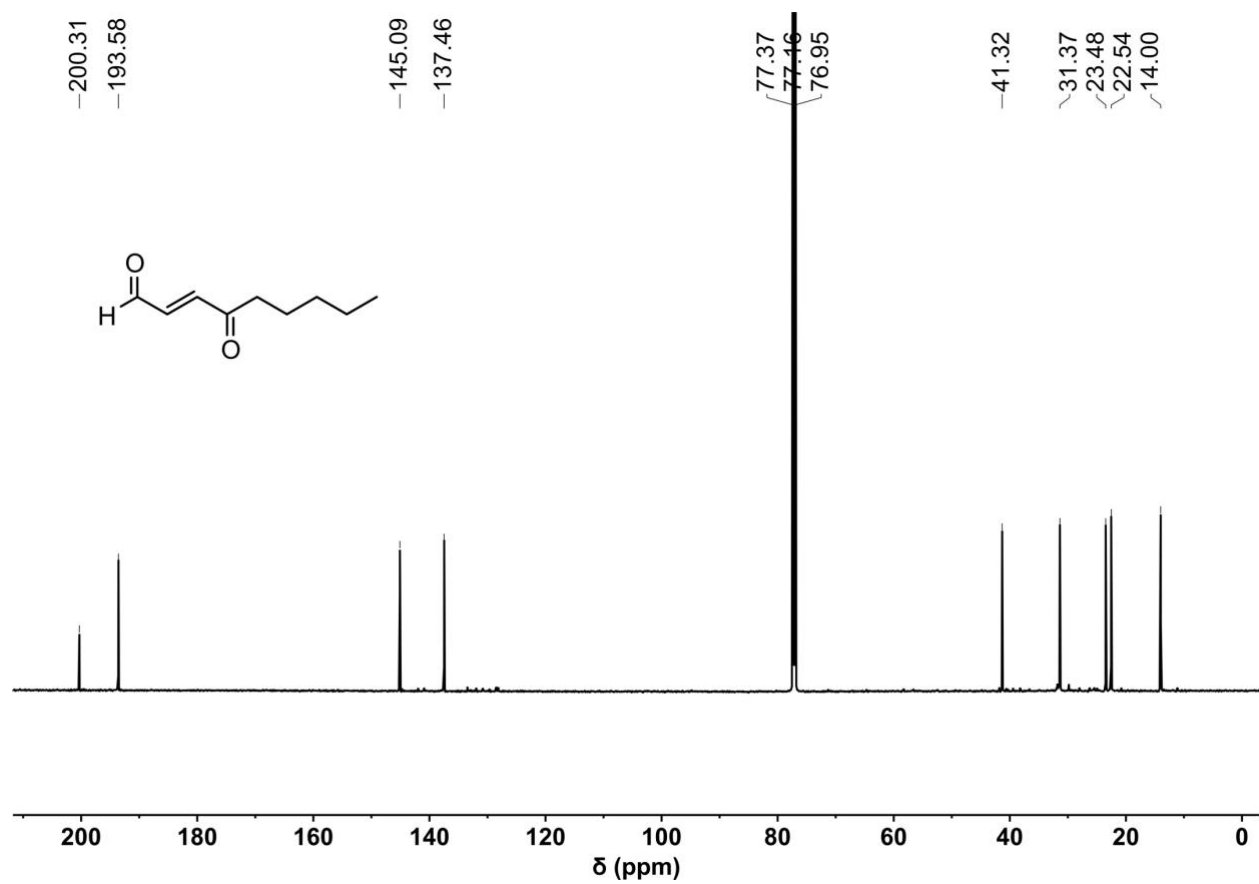

**Figure S33.** <sup>13</sup>C NMR spectrum (CDCl<sub>3</sub>, 151 MHz) of 4-ONE.

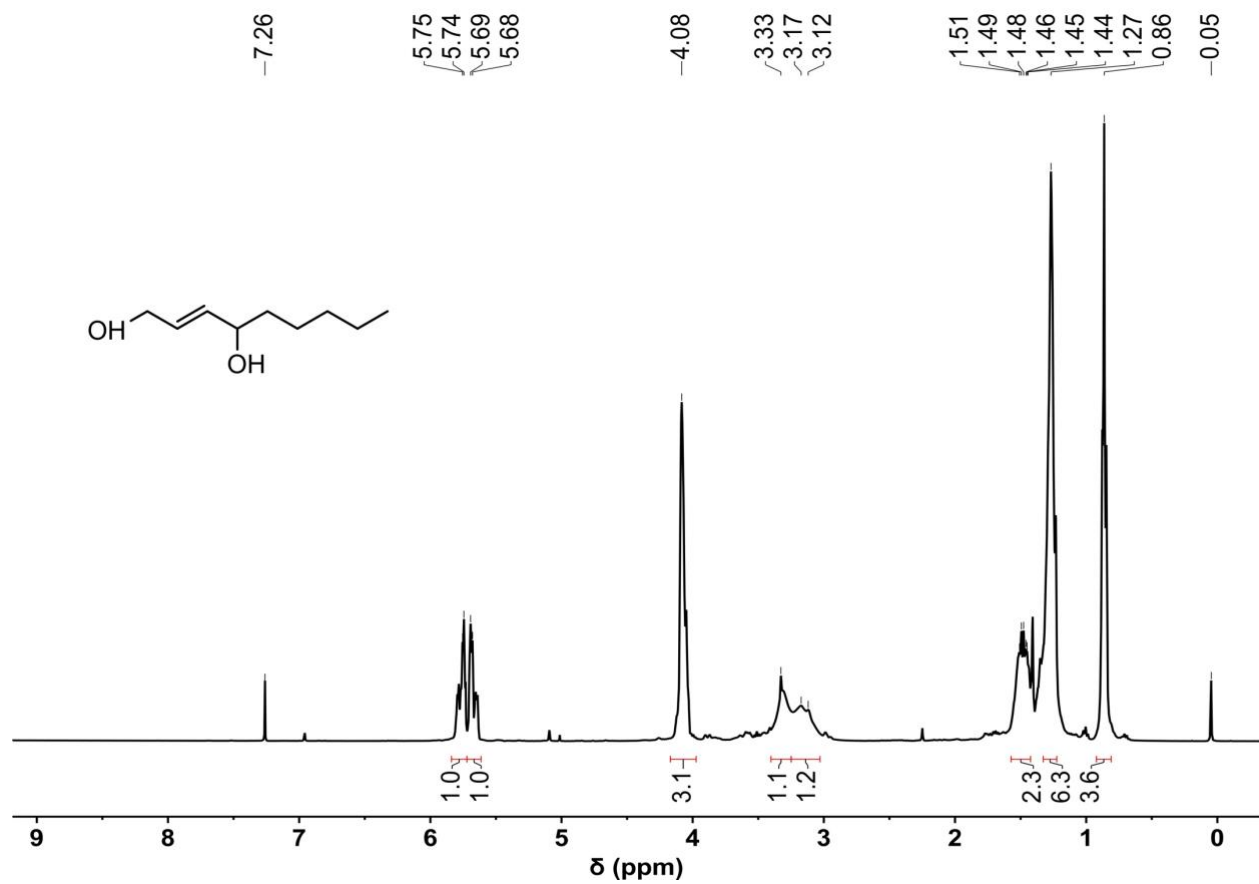

**Figure S34.** <sup>1</sup>H NMR spectrum (CDCl<sub>3</sub>, 400 MHz) of compound I.

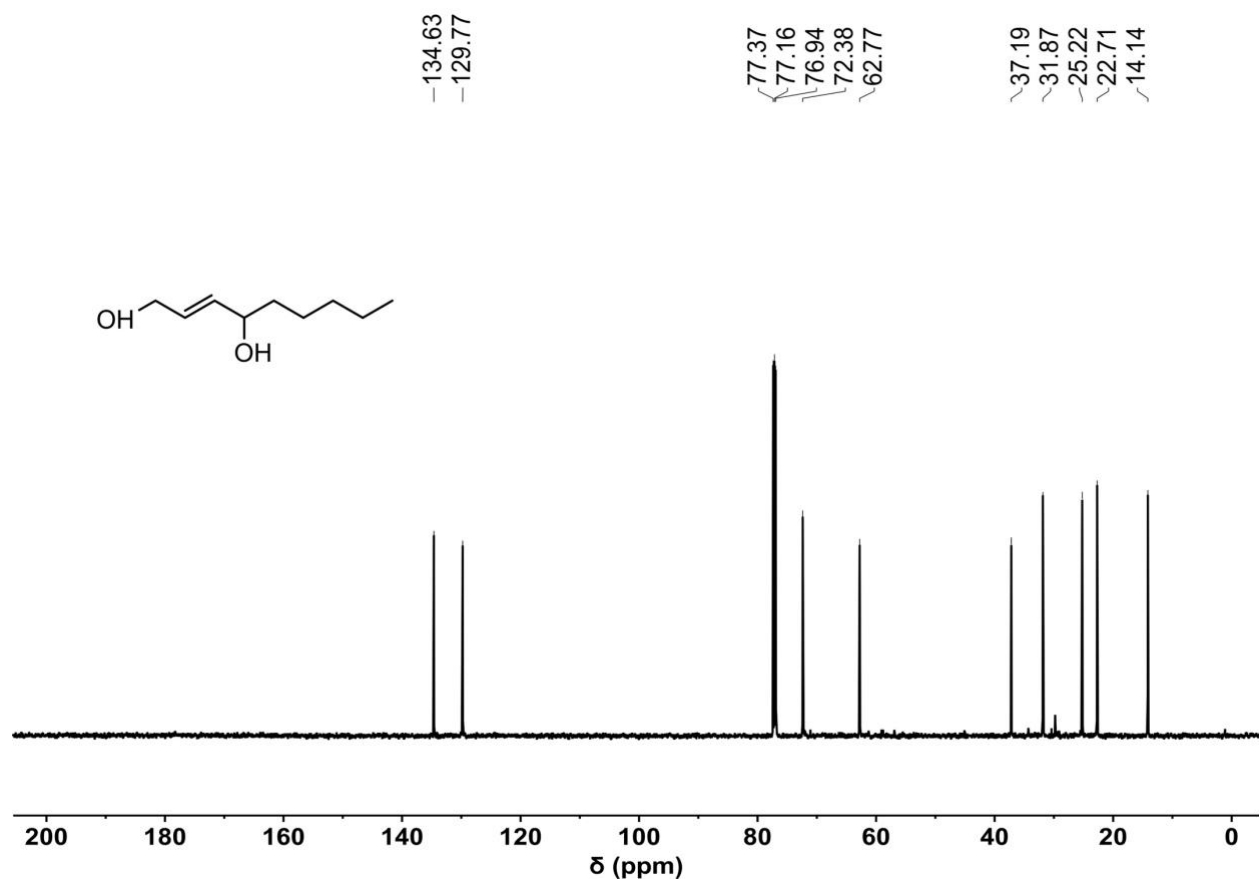

Figure S35.  $^{13}\text{C}$  NMR spectrum (CDCl<sub>3</sub>, 151 MHz) of compound I.

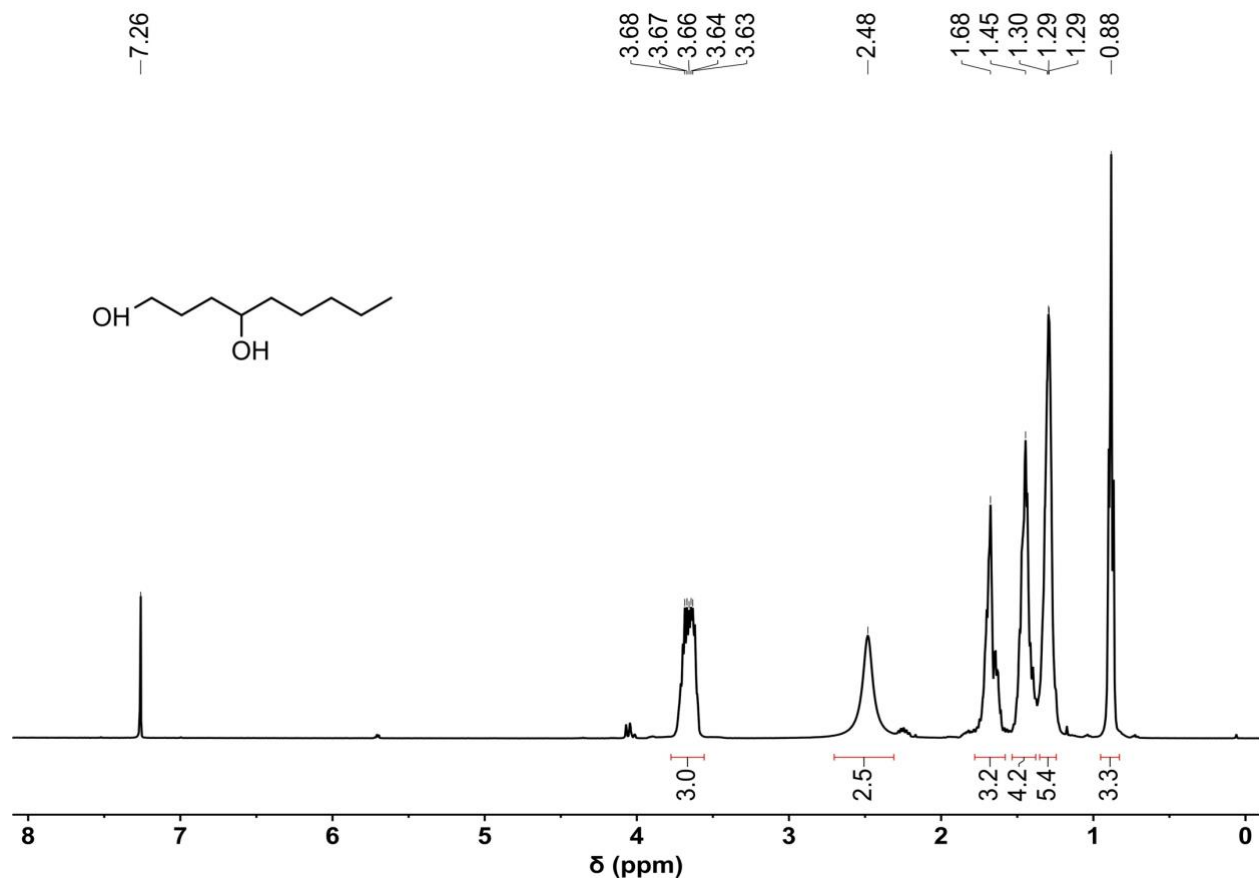

**Figure S36.** <sup>1</sup>H NMR spectrum (CDCl<sub>3</sub>, 500 MHz) of compound II.

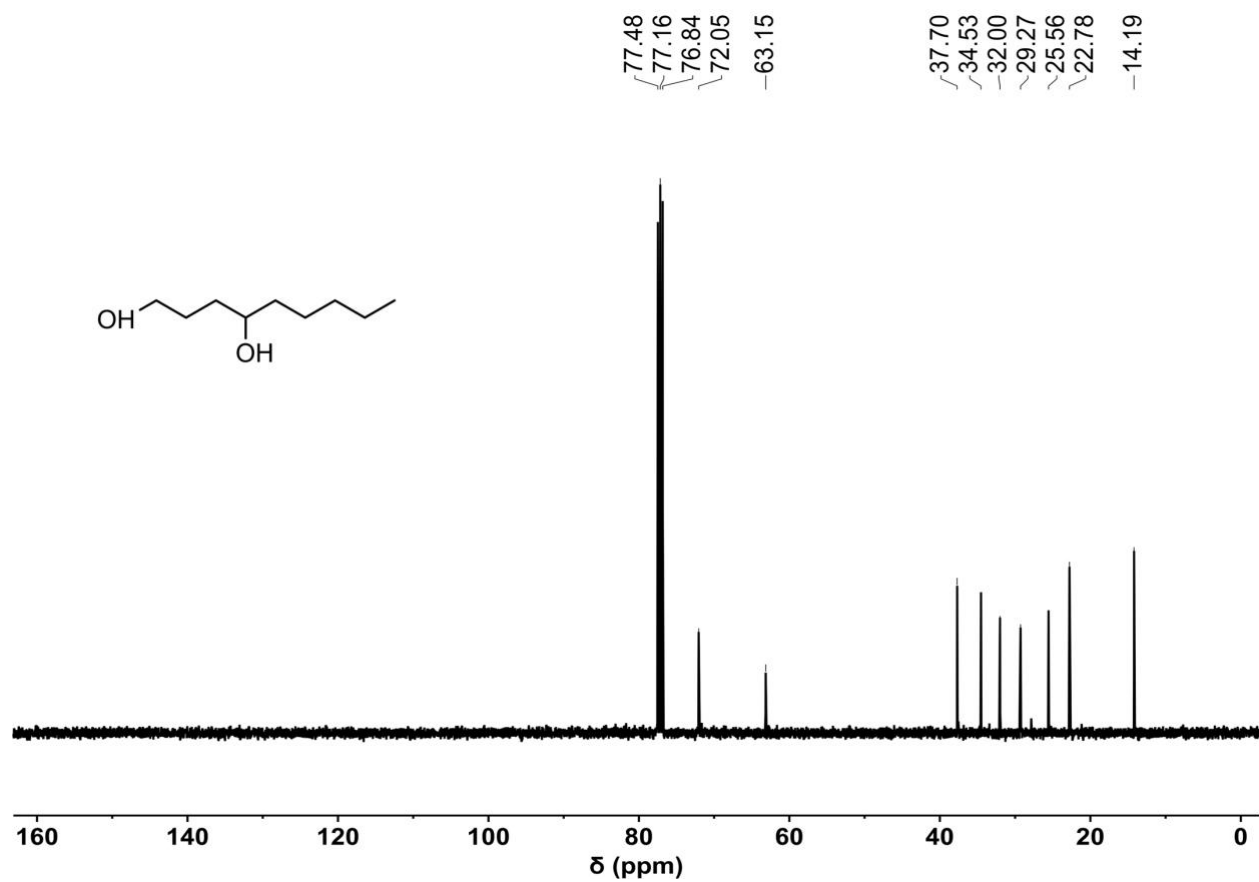

Figure S37.  $^{13}\text{C}$  NMR spectrum (CDCl<sub>3</sub>, 101 MHz) of compound II.



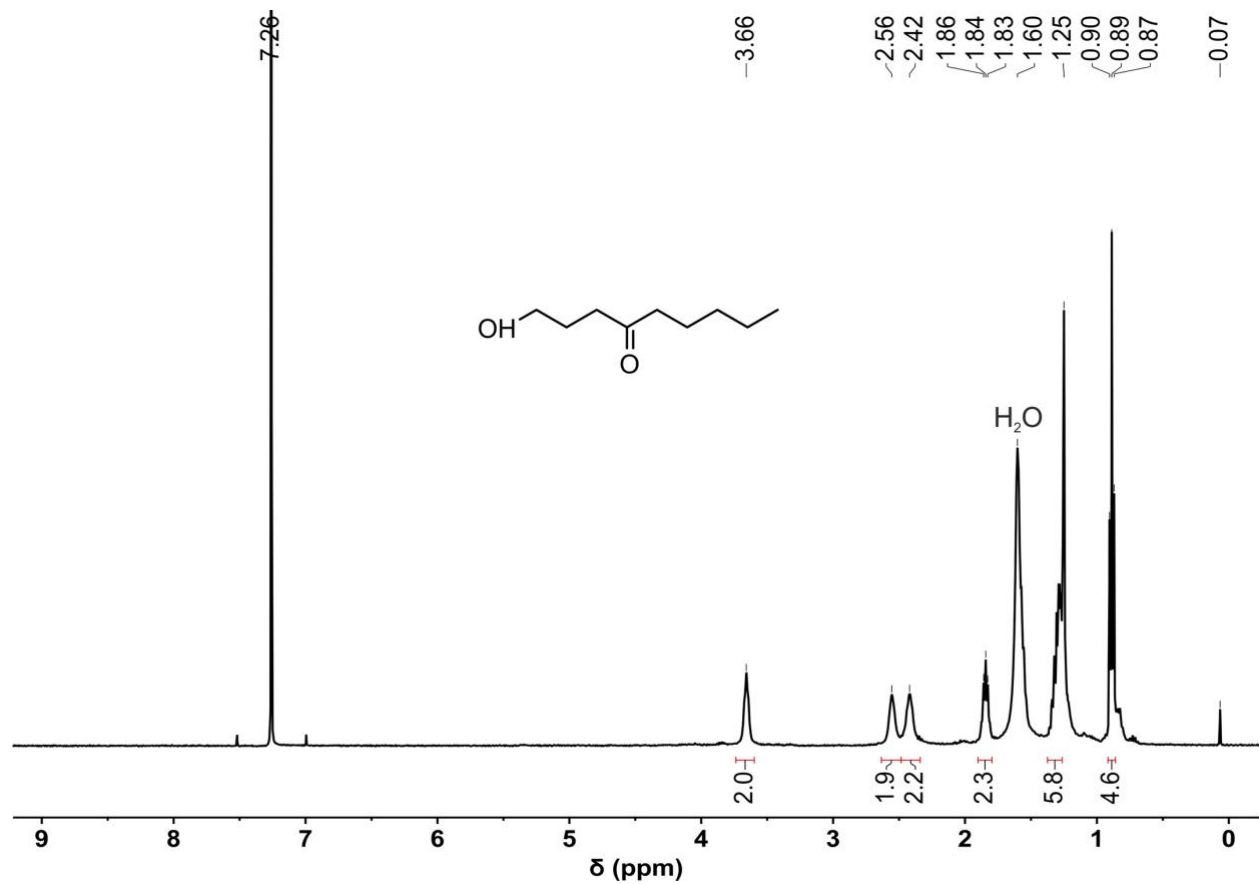

**Figure S38.** <sup>13</sup>C NMR spectrum (CDCl<sub>3</sub>, 500 MHz) of compound III.

## References

- (1) Gardner, H. W.; Bartelt, R. J.; Weisleder, D. *Lipids* **1992**, *27*, 686-689.
- (2) McGrath, C. E.; Tallman, K. A.; Porter, N. A.; Marnett, L. J. *Chem. Res. Toxicol.* **2011**, *24*, 357-370.
- (3) Bates, R. W.; Díez-Martín, D.; Kerr, W. J.; Knight, J. G.; Ley, S. V.; Sakellaridis, A. *Tetrahedron* **1990**, *46*, 4063-4082.
- (4) Guo, J.; Wang, H.; Hrinczenko, B.; Salomon, R. G. *Chem. Res. Toxicol.* **2016**, *29*, 1187-1197.
- (5) Fuji, K.; Usami, Y.; Kiryu, Y.; Node, M. *Synthesis* **1992**, *1992*, 852-858.
